# Supplementary material for: Drug survival of biologics in treating psoriasis: a meta-analysis of real-world evidence
Source: PubMed Central journal article supplement (PMC6207685; doi:10.1038/s41598-018-34293-y), 2018-10-30
Supplement: 41598_2018_34293_MOESM1_ESM.pdf [file 41598_2018_34293_MOESM1_ESM.pdf]

# Supplementary Material

## Drug survival of biologics in treating psoriasis: a meta-analysis of real-world evidence

Pei-Tzu Lin, MS,<sup>a,b</sup> Shu-Hui Wang, MD, MS,<sup>c,d</sup> and Ching-Chi Chi, MD, MMS,

DPhil<sup>e,f\*</sup>

<sup>a</sup>Department of Pharmacy, Chang Gung Memorial Hospital, Chiayi, Chiayi, Taiwan

<sup>b</sup>Department of Nursing, Chang Gung University of Science and Technology, Chiayi, Taiwan

<sup>c</sup>Department of Dermatology, Far Eastern Memorial Hospital, New Taipei, Taiwan

<sup>d</sup>Graduate Institute of Applied Science and Engineering, College of Science and Engineering, Fu Jen Catholic University, New Taipei, Taiwan

<sup>e</sup>Department of Dermatology, Chang Gung Memorial Hospital, Linkou, Taoyuan, Taiwan

<sup>f</sup>College of Medicine, Chang Gung University, Taoyuan, Taiwan

**\*Correspondence:** C.-C. Chi. E-mail: [chingchi@cgmh.org.tw](mailto:chingchi@cgmh.org.tw)

## **Figure legends for supplementary figures**

Supplementary Table S1: Included studies of drug survival of biologics for treating psoriasis.

Supplementary Figure S1: Forest plots of drug survival of biologics for treating psoriasis in all subjects (a-d) with etanercept (a); with adalimumab (b); (c) with infliximab (c); with ustekinumab (d).

Supplementary Figure S2: Forest plots of drug survival of biologics for treating psoriasis in biologic-naïve subjects (a-d) with etanercept (a); with adalimumab (b); (c) with infliximab (c); with ustekinumab (d).

Supplementary Figure S3: Forest plots of drug survival for discontinue due to loss of efficacy (a-d) with etanercept (a); with adalimumab (b); (c) with infliximab (c); with ustekinumab (d).

Supplementary Figure S4: Forest plots of drug survival for discontinue due to adverse effects (a-d) with etanercept (a); with adalimumab (b); with infliximab (c); with ustekinumab (d).

Supplementary Table S1. Included studies of drug survival of biologics for treating psoriasis

| References                       | Patient population<br>n | Drug survival rate |      |         |      |         |      |        |      | NOS score <sup>a</sup> | Note           |
|----------------------------------|-------------------------|--------------------|------|---------|------|---------|------|--------|------|------------------------|----------------|
|                                  |                         | 1 year             |      | 2 years |      | 3 years |      | 4 year |      |                        |                |
|                                  |                         | N                  | %    | n       | %    | n       | %    | n      | %    |                        |                |
| <b>Etanercept</b>                |                         |                    |      |         |      |         |      |        |      |                        |                |
| Arnold et al <sup>9</sup>        | 46                      | 28                 | 60   | 22      | 48   | 17      | 38   | -      | -    | S****; C*; O**         |                |
| Bonafede et al <sup>10</sup>     | 1855                    | 899                | 48.5 | -       | -    | -       | -    | -      | -    | S****; C; O**          | Biologic-naïve |
| Brunasso et al <sup>11</sup>     | 34                      | 21                 | 62.0 | 21      | 62.0 | 21      | 62.0 | 21     | 62.0 | S****; C*; O**         | Biologic-naïve |
|                                  | 13                      | 4                  | 30.0 | 2       | 14.0 | 2       | 14.0 | 2      | 14.0 |                        | Biologic-naïve |
| Chan et al <sup>12</sup>         | 1096                    | 877                | 80.0 | -       | -    | -       | -    | -      | -    | S****; C; O**          |                |
| Davila-Seijo et al <sup>13</sup> | 672                     | 388                | 82.9 | 258     | 49.2 | 168     | 38.0 | 129.0  | 20.5 | S****; C*; O**         |                |
| Doshi et al <sup>14</sup>        | 1025                    | 301                | 29.4 | -       | -    | -       | -    | -      | -    | S****; C*; O**         |                |
| Esposito et al <sup>15</sup>     | 389                     | 362                | 93.0 | 327     | 84.1 | 302     | 77.6 | 293    | 75.2 | S****; C*; O**         |                |
| Gniadecki et al <sup>16</sup>    | 449                     | 295                | 65.7 | 236     | 52.5 | 86      | 19.2 | 159    | 35.4 | S****; C*; O**         |                |
| Gniadecki et al <sup>17</sup>    | 311                     | 229                | 73.5 | 183     | 58.8 | 146     | 47.1 | 128    | 41.2 | S****; C*; O**         |                |
| Inzinger et al <sup>18</sup>     | 501                     | 355                | 70.8 | 305     | 60.8 | 281     | 56.0 | -      | -    | S****; C*; O**         |                |
| Jacobi et al <sup>19</sup>       | 55                      | 37                 | 67.3 | 20      | 36.4 | 22      | 40.0 | 18     | 32.0 | S****; C*; O**         |                |
| Kimball et al <sup>20</sup>      | 2510                    | 1629               | 64.9 | 1329    | 52.9 | 1220    | 48.6 | 1076   | 42.9 | S****; C; O**          |                |
| Di Lernia et al <sup>21</sup>    | 131                     | 86                 | 65.6 |         |      |         |      |        |      | S****; C; O**          |                |

| References                       | Patient population<br>n | Drug survival rate |       |         |      |         |      |        |      | NOS score <sup>a</sup> | Note                         |
|----------------------------------|-------------------------|--------------------|-------|---------|------|---------|------|--------|------|------------------------|------------------------------|
|                                  |                         | 1 year             |       | 2 years |      | 3 years |      | 4 year |      |                        |                              |
|                                  |                         | N                  | %     | n       | %    | n       | %    | n      | %    |                        |                              |
| Di Lernia et al <sup>21</sup>    | 116                     |                    |       | 43      | 37.1 |         |      |        |      | S****; C; O**          |                              |
| Marinas et al <sup>22</sup>      | 175                     | 123                | 82.6  | 90      | 68.7 | 60      | 56.3 | 33     | 47.5 | S****; C; O**          |                              |
| Menter et al <sup>23</sup>       | 289                     | 196                | 67.7  | 168     | 58.1 | 154     | 53.2 | 140    | 48.4 | S****; C**; O**        | Biologic-naïve               |
|                                  | 155                     | 90                 | 58.1  | 75      | 48.4 | 65      | 41.9 | 55     | 35.5 |                        | 2 <sup>nd</sup> line therapy |
|                                  | 71                      | 39                 | 54.8  | 36      | 50.0 | 34      | 48.6 | 25     | 35.5 |                        | 3 <sup>rd</sup> line therapy |
| Menting et al <sup>24</sup>      | 118                     | 100                | 85.0  | 94      | 79.6 | 91      | 77.0 | 76     | 64.0 | S***; C; O**           | Biologic-naïve               |
|                                  | 55                      | 47                 | 86.0  | 39      | 71.4 | 35      | 62.9 | 23     | 42.0 |                        | Biologic-experienced         |
| Mercadal et al <sup>25</sup>     | 34                      | -                  | -     | 21      | 62   | -       | -    | -      | -    | S****; C*; O**         |                              |
| Mitratza et al <sup>26</sup>     | 58                      | 37                 | 64.0  | -       | -    | 15      | 26.0 | -      | -    | S****; C*; O**         | Biologic-naïve               |
| Pogácsás et al <sup>27</sup>     | 330                     | 241                | 72.9  | 195     | 59.2 | 156     | 47.4 |        |      | S****; C*; O**         |                              |
| Richter et al <sup>28</sup>      | 55                      | 28                 | 50.9  | 13      | 23.6 | 5       | 9.1  | 4      | 7.3  | S****; C*; O**         |                              |
| Ross et al <sup>29</sup>         | 21                      | 12                 | 59.3  | 11      | 52.5 | 10      | 49.2 | 10     | 49.2 | S****; C**; O**        |                              |
| Shalom et al <sup>30</sup>       | 646                     | 167                | 25.87 | 82      | 12.7 | 41      | 6.35 |        |      | S****; C**; O**        |                              |
| Van den Reek et al <sup>31</sup> | 82                      | 56                 | 68.0  | -       | -    | -       | -    | -      | -    | S****; C*; O**         |                              |
| Van den Reek et al <sup>32</sup> | 148                     | 106                | 71.8  | 85      | 57.7 | 69      | 46.8 | 51     | 34.6 | S****; C*; O**         | Biologic-naïve               |
|                                  | 45                      | 38                 | 84.6  | 31      | 68.0 | 28      | 62.8 | 25     | 55.8 |                        | Biologic-experienced         |
| Ventayol et al <sup>33</sup>     | 34                      | -                  | -     | 21      | 62.0 | -       | -    | -      | -    | S****; C; O**          | Biologic-naïve               |

| References                       | Patient<br>populatio<br>n | Drug survival rate |       |         |       |         |       |        |       | NOS score <sup>a</sup> | Note                 |
|----------------------------------|---------------------------|--------------------|-------|---------|-------|---------|-------|--------|-------|------------------------|----------------------|
|                                  |                           | 1 year             |       | 2 years |       | 3 years |       | 4 year |       |                        |                      |
|                                  |                           | N                  | %     | n       | %     | n       | %     | n      | %     |                        |                      |
| Vilarrasa et al <sup>34</sup>    | 248                       | 176                | 70.9  | 130     | 52.6  | 97      | 39.1  | 76     | 30.5  | S****; C*; O**         |                      |
| Warren et al <sup>35</sup>       | 1098                      | 769                | 70.0  | 560     | 51.0  | 439     | 40.0  | -      | -     | S****; C*; O**         |                      |
| Zweegers et al <sup>36</sup>     | 238                       | 178                | 74.6  | 143     | 60.3  | 117     | 49.3  | 98     | 41.1  | S****; C*; O**         |                      |
| <b>Adalimumab</b>                |                           |                    |       |         |       |         |       |        |       |                        |                      |
| Arnold et al <sup>9</sup>        | 137                       | 96                 | 70    | 73      | 53    | 67      | 49    | -      | -     | S****; C*; O**         |                      |
| Bonafede et al <sup>10</sup>     | 1901                      | 802                | 49.2  | -       | -     | -       | -     | -      | -     | S****; C; O**          | Biologic-naïve       |
| Brunasso et al <sup>11</sup>     | 7                         | 7                  | 100.0 | 7       | 100.0 | 7       | 100.0 | 7      | 100.0 | S****; C*; O**         | Biologic-naïve       |
|                                  | 8                         | 6                  | 74.0  | 6       | 74.0  | -       | -     | -      | -     |                        | Biologic-experienced |
| Davila-Seijo et al <sup>13</sup> | 724                       | 473                | 65.4  | 334     | 46.2  | 242     | 33.5  | 195    | 26.9  | S****; C*; O**         |                      |
| Doshi et al <sup>14</sup>        | 1084                      | 438                | 40.4  | -       | -     | -       | -     | -      | -     | S****; C*; O**         |                      |
| Esposito et al <sup>15</sup>     | 114                       | 99                 | 86.5  | 80      | 70.1  | 67      | 58.4  | 56     | 49.5  | S****; C*; O**         |                      |
| Gniadecki et al <sup>16</sup>    | 774                       | 524                | 67.7  | 481     | 62.1  | 414     | 53.5  | 379    | 49.0  | S****; C*; O**         |                      |
| Gniadecki et al <sup>17</sup>    | 427                       | 289                | 67.7  | 214     | 50.0  | 163     | 38.2  | 151    | 35.3  | S****; C*; O**         |                      |
| Inzinger et al <sup>18</sup>     | 460                       | 326                | 70.9  | 262     | 57.0  | 237     | 51.6  | -      | -     | S****; C*; O**         |                      |
| Jacobi et al <sup>19</sup>       | 37                        | 22                 | 59.5  | 14      | 37.8  | 20      | 55.2  | 16     | 43.2  | S****; C*; O**         |                      |
| Di Lernia et al <sup>21</sup>    | 78                        | 51                 | 65.4  |         |       |         |       |        |       | S****; C; O**          |                      |
| Di Lernia et al <sup>21</sup>    | 58                        |                    |       | 27      | 46.6  |         |       |        |       | S****; C; O**          |                      |

| References                       | Patient<br>populatio<br>n | Drug survival rate |      |         |      |         |      |        |      | NOS score <sup>a</sup> | Note                         |
|----------------------------------|---------------------------|--------------------|------|---------|------|---------|------|--------|------|------------------------|------------------------------|
|                                  |                           | 1 year             |      | 2 years |      | 3 years |      | 4 year |      |                        |                              |
|                                  |                           | N                  | %    | n       | %    | n       | %    | n      | %    |                        |                              |
| Lopez-Ferrer et al <sup>37</sup> | 49                        | 38                 | 78.5 | 38      | 78.5 | 38      | 78.5 | 32     | 65.9 | S****; C*; O**         | Biologic-naïve               |
|                                  | 70                        | 42                 | 60.3 | 33      | 47.7 | 32      | 45.8 | 32     | 45.8 |                        | Biologic-experienced         |
| Marinas et al <sup>22</sup>      | 134                       | 82                 | 80.4 | 53      | 64.8 | 28      | 55   | 19     | 50.8 | S****; C; O**          |                              |
| Menter et al <sup>23</sup>       | 402                       | 318                | 79.2 | 263     | 65.5 | 263     | 65.5 | 188    | 46.8 | S****; C**; O**        | Biologic-naïve               |
|                                  | 622                       | 441                | 71.0 | 371     | 59.7 | 341     | 54.8 | 311    | 50.0 |                        | 2 <sup>nd</sup> line therapy |
|                                  | 197                       | 130                | 66.1 | 108     | 54.8 | 95      | 48.4 | 79     | 40.3 |                        | 3 <sup>rd</sup> line therapy |
| Menting et al <sup>24</sup>      | 29                        | 22                 | 77.0 | 22      | 77.0 | 22      | 77.0 | 22     | 77.0 | S****; C; O**          | Biologic-naïve               |
|                                  | 58                        | 49                 | 84.0 | 43      | 74.3 | 35      | 60.0 | 32     | 56.0 |                        | Biologic-experienced         |
| Mercadal et al <sup>25</sup>     | 37                        |                    |      | 18      | 48   |         |      |        |      | S****; C*; O**         |                              |
| Mitratza et al <sup>26</sup>     | 30                        | 16                 | 51.9 | -       | -    | 7       | 22.2 | -      | -    | S****; C*; O**         | Biologic-naïve               |
| Pogácsás et al <sup>27</sup>     | 491                       | 329                | 67.1 | 284     | 57.9 | 246     | 50   |        |      | S****; C*; O**         |                              |
| Richter et al <sup>28</sup>      | 106                       | 68                 | 64.1 | 52      | 49.1 | 34      | 32.1 | 24     | 22.6 | S****; C*; O**         |                              |
| Ross et al <sup>29</sup>         | 24                        | 18                 | 74.6 | 13      | 54.2 | 9       | 37.3 | 9      | 37.3 | S****; C**; O**        |                              |
| Shalom et al <sup>30</sup>       | 554                       | 167                | 30.2 | 163     | 29.4 | 106     | 19.1 |        |      | S****; C**; O**        |                              |
| Spertino et al <sup>38</sup>     | 63                        | 43                 | 67.7 | 33      | 52.3 | 26      | 41.5 | 25     | 40.0 | S****; C*; O**         |                              |
| Suarez-Perez et al <sup>39</sup> | 50                        | -                  | -    | -       | -    | 35      | 70.0 | -      | -    | S****; C*; O**         |                              |
| Umezawa et al <sup>40</sup>      | 59                        | 47                 | 79.7 | -       | -    | -       | -    | -      | -    | S****; C; O**          |                              |

| References                       | Patient<br>populatio<br>n | Drug survival rate |       |         |       |         |       |        |       | NOS score <sup>a</sup> | Note                 |
|----------------------------------|---------------------------|--------------------|-------|---------|-------|---------|-------|--------|-------|------------------------|----------------------|
|                                  |                           | 1 year             |       | 2 years |       | 3 years |       | 4 year |       |                        |                      |
|                                  |                           | N                  | %     | n       | %     | n       | %     | n      | %     |                        |                      |
| Van den Reek et al <sup>41</sup> | 459                       | 362                | 78.8  | 275     | 60.0  | 253     | 55.1  | 243    | 53.0  | S***; C*; O**          |                      |
| Van den Reek et al <sup>42</sup> | 116                       | 88                 | 76.0  | 66      | 57.0  | 65      | 56.0  | 60     | 52.0  | S***; C*; O**          |                      |
| Van den Reek et al <sup>31</sup> | 101                       | 75                 | 74.0  | -       | -     | -       | -     | -      | -     | S****; C*; O**         |                      |
| Van den Reek et al <sup>43</sup> | 116                       | -                  | -     | -       | -     | -       | -     | 58     | 50.0  | S****; C*; O**         |                      |
| Ventayol et al <sup>33</sup>     | 37                        | -                  | -     | 18      | 48.0  | -       | -     | -      | -     | S****; C; O**          | Biologic-naïve       |
| Vilarrasa et al <sup>34</sup>    | 231                       | 159                | 69.0  | 123     | 53.2  | 97      | 41.9  | 81     | 34.9  | S****; C**; O**        |                      |
| Warren et al <sup>35</sup>       | 1879                      | 1484               | 79.0  | 1259    | 67.0  | 1109    | 59.0  |        |       | S****; C*; O**         |                      |
| Zweegers et al <sup>36</sup>     | 186                       | 141                | 75.8  | 112     | 60.3  | 102     | 54.8  | 89     | 47.9  | S****; C*; O**         |                      |
| <b>Infliximab</b>                |                           |                    |       |         |       |         |       |        |       |                        |                      |
| Arnold et al <sup>9</sup>        | 140                       | 74                 | 53    | 52      | 37    | 52      | 37    | -      | -     | S****; C*; O**         |                      |
| Brunasso et al <sup>11</sup>     | 33                        | 6                  | 18.0  | 5       | 14.0  | 5       | 14.0  | 5      | 14.0  | S****; C*; O**         | Biologic-naïve       |
|                                  | 2                         | 2                  | 100.0 | 2       | 100.0 | 2       | 100.0 | 2      | 100.0 |                        | Biologic-experienced |
| Davila-Seijo et al <sup>13</sup> | 188                       | 123                | 65.4  | 87      | 46.2  | 65      | 34.6  | 54     | 28.9  | S****; C*; O**         |                      |
| Doshi et al <sup>14</sup>        | 318                       | 157                | 49.4  | -       | -     | -       | -     | -      | -     | S****; C*; O**         |                      |
| Esposito et al <sup>15</sup>     | 147                       | 117                | 79.4  | 89      | 60.8  | 70      | 47.7  | 57     | 38.8  | S****; C*; O**         |                      |
| Gniadecki et al <sup>16</sup>    | 253                       | 180                | 71.2  | 146     | 57.6  | 130     | 51.5  | 111    | 43.9  | S****; C*; O**         |                      |
| Gniadecki et al <sup>17</sup>    | 144                       | 123                | 85.3  | 110     | 76.5  | 102     | 70.6  | 97     | 67.7  | S****; C*; O**         |                      |

| References                    | Patient<br>populatio<br>n | Drug survival rate |      |         |      |         |      |        |      | NOS score <sup>a</sup> | Note                         |
|-------------------------------|---------------------------|--------------------|------|---------|------|---------|------|--------|------|------------------------|------------------------------|
|                               |                           | 1 year             |      | 2 years |      | 3 years |      | 4 year |      |                        |                              |
|                               |                           | N                  | %    | n       | %    | n       | %    | n      | %    |                        |                              |
| Inzinger et al <sup>18</sup>  | 58                        | 34                 | 58.0 | 17      | 30.1 | 13      | 22.6 | -      | -    | S****; C*; O**         |                              |
| Jacobi et al <sup>19</sup>    | 13                        | 7                  | 7.0  | 3       | 3.0  | -       | -    | -      | -    | S****; C*; O**         |                              |
| Di Lernia et al <sup>21</sup> | 98                        | 70                 | 64.6 |         |      |         |      |        |      | S****; C; O**          |                              |
| Di Lernia et al <sup>21</sup> | 89                        |                    |      | 41      | 37.1 |         |      |        |      | S****; C; O**          |                              |
| Marinas et al <sup>22</sup>   | 160                       | 40                 | 83.8 | 30      | 66.4 | 25      | 55.4 | 19     | 48.5 | S****; C; O**          |                              |
| Menter et al <sup>23</sup>    | 63                        | 53                 | 83.9 | 49      | 77.4 | 43      | 67.7 | 34     | 53.2 | S****; C**; O**        | Biologic-naïve               |
|                               | 93                        | 63                 | 67.7 | 51      | 54.8 | 24      | 25.8 | 15     | 16.1 |                        | 2 <sup>nd</sup> line therapy |
|                               | 103                       | 71                 | 69.4 | 58      | 56.5 | 40      | 38.7 | 37     | 35.5 |                        | 3 <sup>rd</sup> line therapy |
| Menting et al <sup>24</sup>   | 19                        | 14                 | 75.0 | 14      | 75.0 | 14      | 75.0 | 14     | 75.0 | S****; C; O**          | Biologic-naïve               |
|                               | 21                        | 14                 | 68.0 | 13      | 60.0 | 9       | 42.9 | 9      | 43.0 |                        | Biologic-experienced         |
| Mitratza et al <sup>26</sup>  | 21                        | 11                 | 54.4 | -       | -    | 9       | 42.9 | -      | -    | S*****; C*; O**        | Biologic-naïve               |
| Pogácsás et al <sup>27</sup>  | 266                       | 182                | 68.4 | 144     | 54.0 | 91      | 34.2 | -      | -    | S****; C*; O**         |                              |
| Ross et al <sup>29</sup>      | 14                        | 10                 | 69.5 | 10      | 69.5 | 8       | 59.3 | 6      | 41.5 | S****; C**; O**        |                              |
| Shalom et al <sup>30</sup>    | 152                       | 46                 | 30.2 | 29      | 19.1 | 22      | 14.3 |        |      | S****; C**; O**        |                              |
| Umezawa et al <sup>40</sup>   | 38                        | 28                 | 73.3 | -       | -    | -       | -    | -      | -    | S****; C; O**          |                              |
| Vilarrasa et al <sup>34</sup> | 84                        | 58                 | 68.8 | 46      | 54.2 | 38      | 45.5 | 36     | 42.4 | S****; C**; O**        |                              |
| Warren et al <sup>35</sup>    | 96                        | 62                 | 65.0 | 48      | 50.0 | 34      | 35.0 | -      | -    | S****; C*; O**         |                              |



| References                          | Patient<br>populatio<br>n | Drug survival rate |       |         |      |         |      |        |      | NOS score <sup>a</sup> | Note                         |
|-------------------------------------|---------------------------|--------------------|-------|---------|------|---------|------|--------|------|------------------------|------------------------------|
|                                     |                           | 1 year             |       | 2 years |      | 3 years |      | 4 year |      |                        |                              |
|                                     |                           | N                  | %     | n       | %    | n       | %    | n      | %    |                        |                              |
| <b>Ustekinumab</b>                  |                           |                    |       |         |      |         |      |        |      |                        |                              |
| Arnold et al <sup>9</sup>           | 59                        | 53                 | 90.0  | 49      | 83.0 | 49      | 83.0 | -      | -    | S****; C*; O**         |                              |
| Davila-Seijo et al <sup>13</sup>    | 491                       | 397                | 80.8  | 312     | 63.5 | 246     | 50.0 | 208    | 42.3 | S****; C*; O**         |                              |
| Doshi et al <sup>14</sup>           | 280                       | 121                | 43.2  | -       | -    | -       | -    | -      | -    | S****; C*; O**         |                              |
| García-Martínez et al <sup>44</sup> | 35                        | 32                 | 90.0  | 25      | 71.0 | 24      | 69.0 | -      | -    | S****; C; O**          |                              |
| Gniadecki et al <sup>16</sup>       | 391                       | 308                | 78.8  | 278     | 71.2 | 271     | 69.2 | 263    | 67.2 | S****; C*; O**         |                              |
| Jacobi et al <sup>19</sup>          | 11                        | 11                 | 100.0 | 6       | 54.6 | 8       | 76.0 | -      | -    | S****; C*; O**         |                              |
| Marinas et al <sup>22</sup>         | 176                       | 122                | 91.4  | 85      | 85.6 | 47      | 80.0 | 18     | 75.5 | S****; C; O**          |                              |
| Menter et al <sup>23</sup>          | 301                       | 282                | 93.6  | 272     | 90.3 | 262     | 87.1 | 262    | 87.1 | S****; C**; O**        | Biologic-naïve               |
|                                     | 566                       | 493                | 87.1  | 456     | 80.7 | 438     | 77.4 | 438    | 77.4 |                        | 2 <sup>nd</sup> line therapy |
|                                     | 551                       | 462                | 83.9  | 427     | 77.4 | 391     | 71.0 | 373    | 67.7 |                        | 3 <sup>rd</sup> line therapy |
| Menting et al <sup>24</sup>         | 1                         | -                  | -     | -       | -    | -       | -    | -      | -    | S****; C; O**          | Biologic-naïve               |
|                                     | 21                        | 18                 | 84.0  | 14      | 65.7 | 12      | 57.0 | -      | -    |                        | Biologic-experienced         |
| Mercadal et al <sup>25</sup>        | 41                        | -                  | -     | 33      | 81.0 | -       | -    | -      | -    | S****; C*; O**         |                              |
| Mitratza et al <sup>26</sup>        | 25                        | 21                 | 82.6  | -       | -    | 12      | 47.8 | -      | -    | S*****; C*; O**        | Biologic-naïve               |
| Pogácsás et al <sup>27</sup>        | 487                       | 410                | 84.2  | 352     | 72.3 | 320     | 65.8 |        |      | S****; C*; O**         |                              |

| References                       | Patient<br>populatio<br>n | Drug survival rate |      |         |      |         |      |        |      | NOS score <sup>a</sup> | Note           |
|----------------------------------|---------------------------|--------------------|------|---------|------|---------|------|--------|------|------------------------|----------------|
|                                  |                           | 1 year             |      | 2 years |      | 3 years |      | 4 year |      |                        |                |
|                                  |                           | N                  | %    | n       | %    | n       | %    | n      | %    |                        |                |
| Richter et al <sup>28</sup>      | 48                        | 34                 | 70.8 | 18      | 37.5 | 7       | 14.6 | 2      | 4.2  | S****; C*; O**         |                |
| Ross et al <sup>29</sup>         | 25                        | 23                 | 93.2 | 23      | 93.2 | -       | -    | -      | -    | S****; C**; O**        |                |
| Shalom et al <sup>30</sup>       | 224                       | 171                | 76.2 | 149     | 66.7 | 139     | 61.9 |        |      | S****; C**; O**        |                |
| Suarez-Perez et al <sup>45</sup> | 44                        | -                  | -    | -       | -    | 37      | 84.0 | -      | -    | S***; C*; O**          |                |
| Umezawa et al <sup>40</sup>      | 30                        | 29                 | 96.7 | -       | -    | -       | -    | -      | -    | S****; C; O**          |                |
| Van den Reek et al <sup>31</sup> | 66                        | 56                 | 85.0 | -       | -    | -       | -    | -      | -    | S****; C*; O**         |                |
| Ventayol et al <sup>33</sup>     | 41                        | -                  | -    | 33      | 81.0 | -       | -    | -      | -    | S****; C; O**          | Biologic-naïve |
| Vilarrasa et al <sup>34</sup>    | 140                       | 108                | 77.2 | 96      | 68.5 | 87      | 61.8 | 81     | 57.8 | S****; C**; O**        |                |
| Warren et al <sup>35</sup>       | 450                       | 401                | 89.0 | 369     | 82.0 | 338     | 75.0 | -      | -    | S****; C*; O**         |                |
| Zweegers et al <sup>36</sup>     | 102                       | 86                 | 84.0 | 75      | 73.6 | 73      | 71.2 | 73     | 71.2 | S****; C*; O**         |                |

NOS Newcastle–Ottawa scale

<sup>a</sup> :Scale domains: S selection of study groups, C comparability, O outcome assessment

Supplemental Figure S1(a): Forest plots of drug survival of biologics for treating psoriasis in all subjects with etanercept.

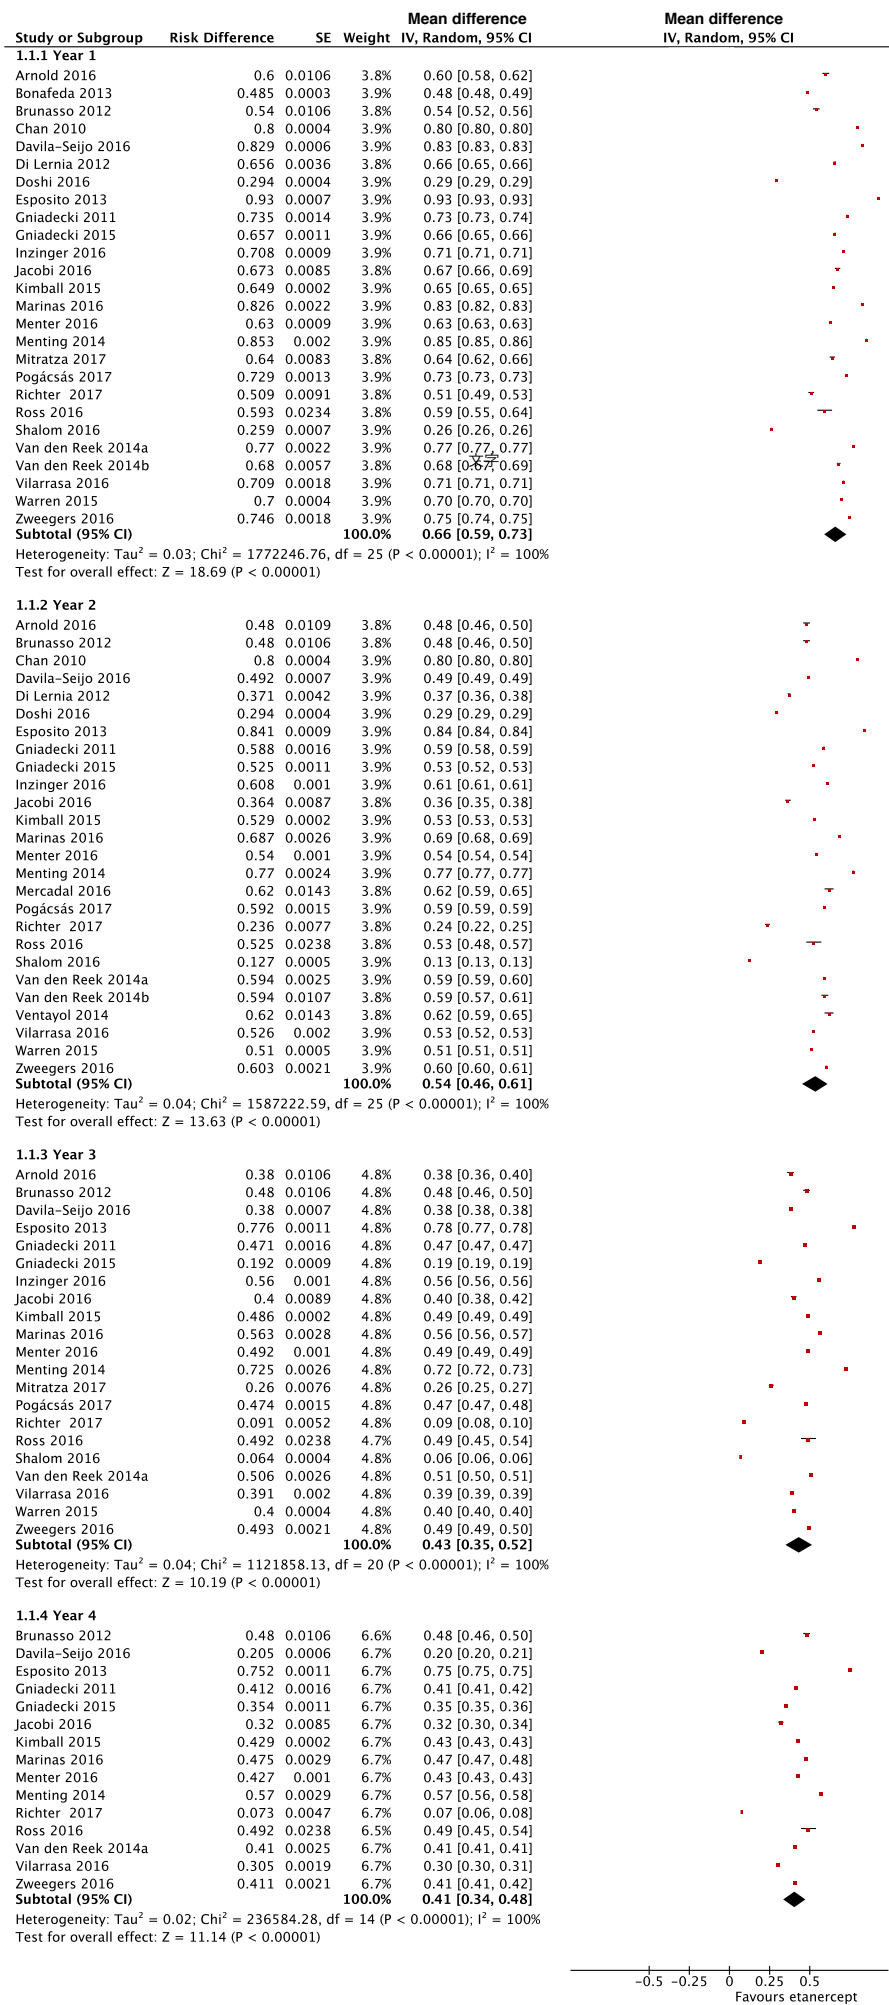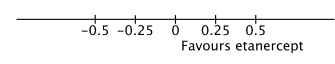

# Supplementary Figure S1(b): Forest plots of drug survival of biologics for treating psoriasis in all subjects with adalimumab.

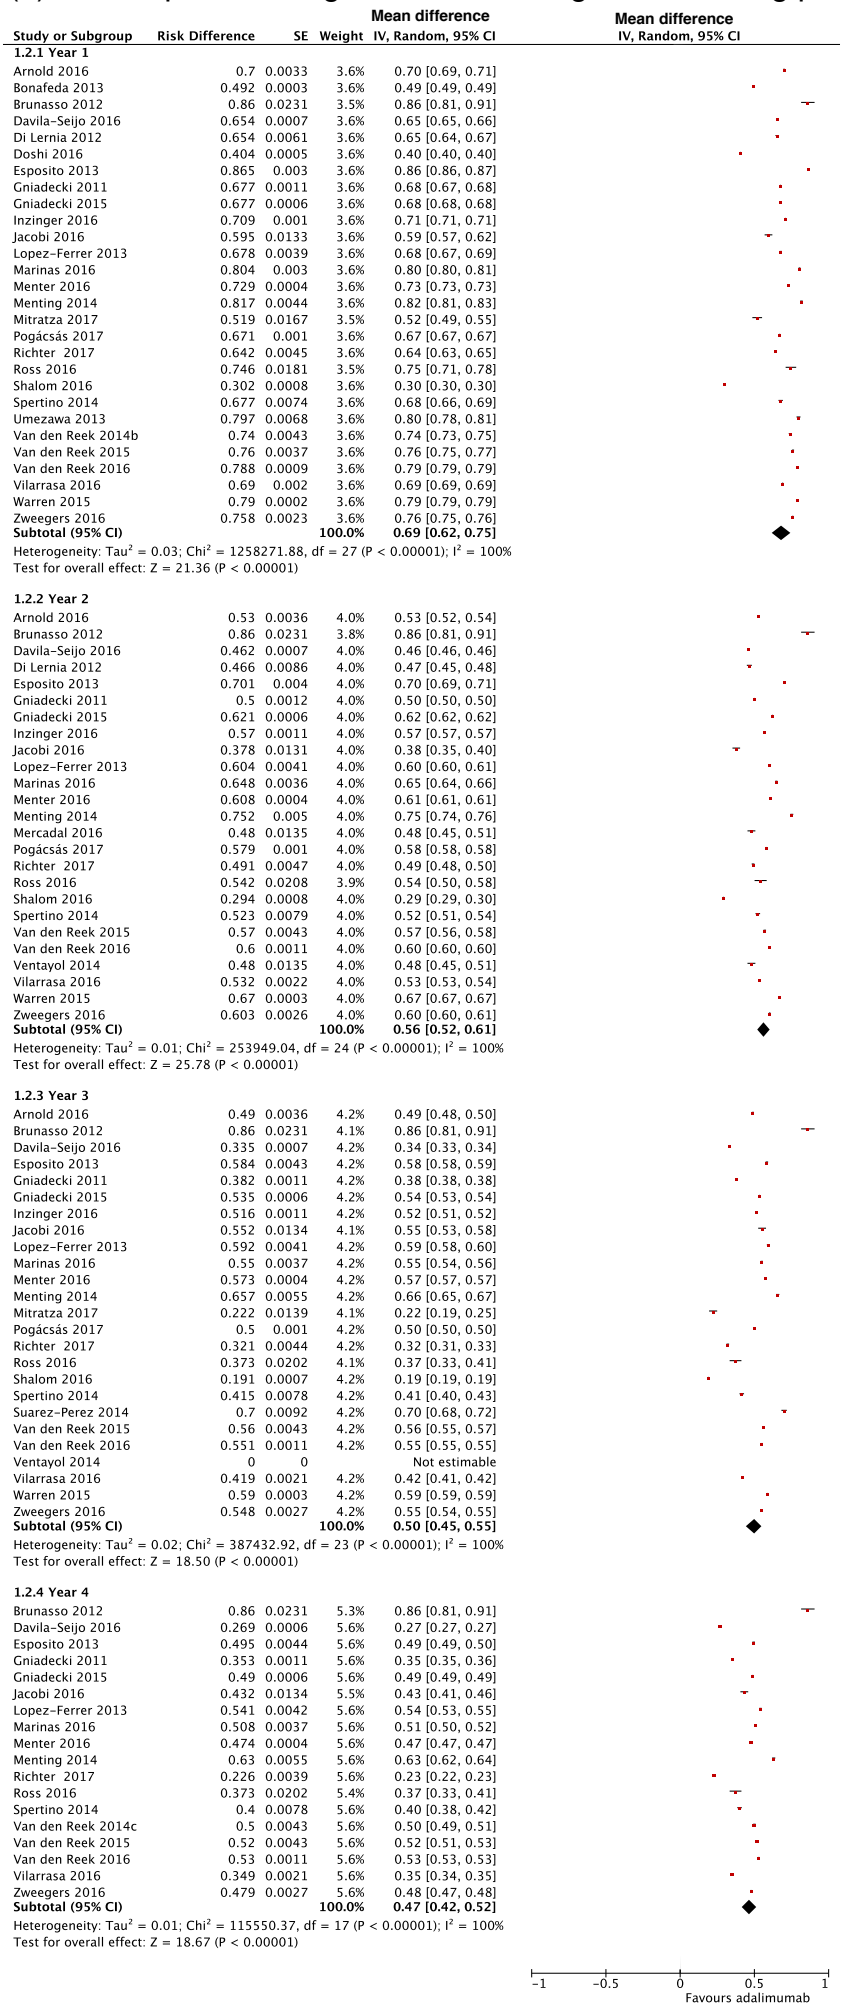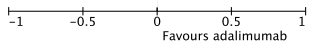

Supplementary Figure S1(c): Forest plots of drug survival of biologics for treating psoriasis in all subjects with infliximab.

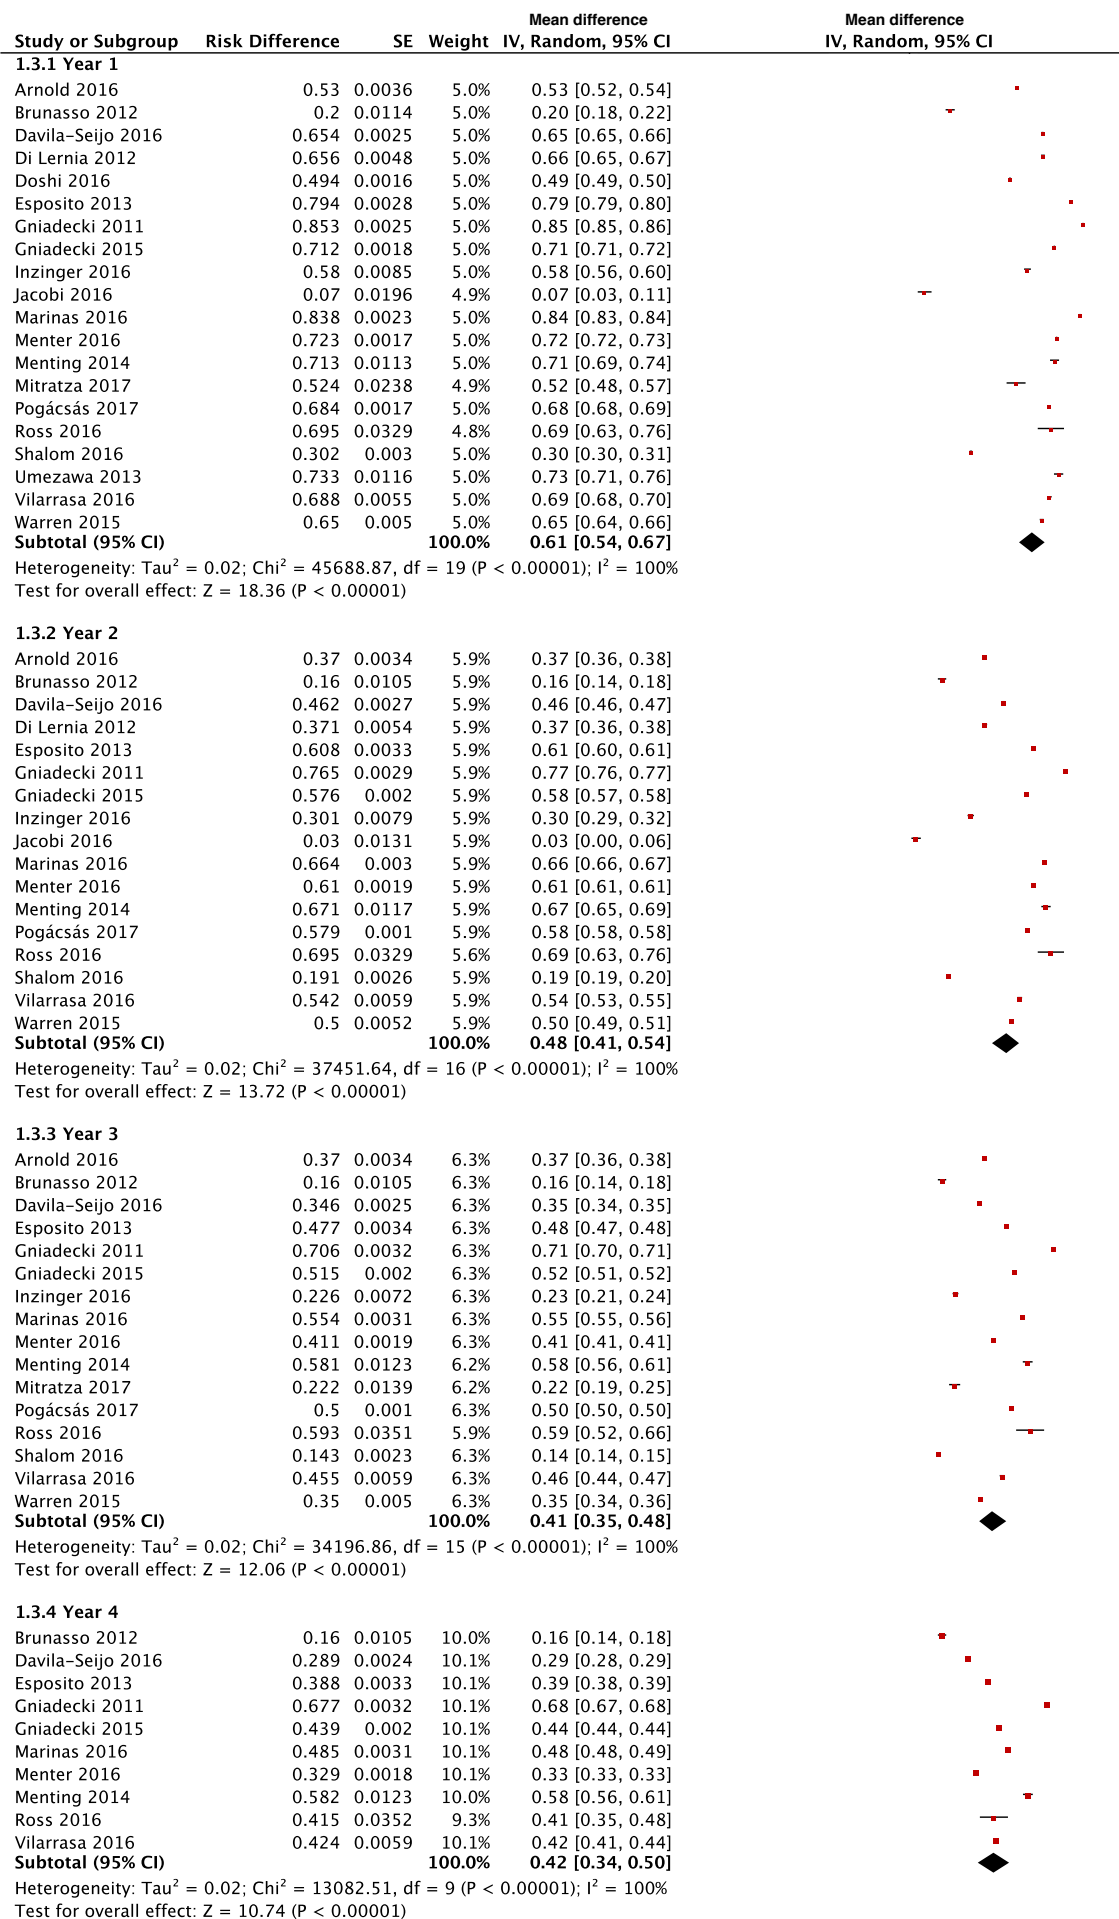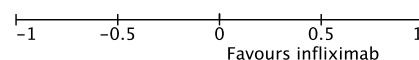

Test for subgroup differences: Chi<sup>2</sup> = 20.71, df = 3 (P = 0.0001), I<sup>2</sup> = 85.5%

Supplementary Figure S1(d): Forest plots of drug survival of biologics for treating psoriasis in all subjects with ustekinumab.

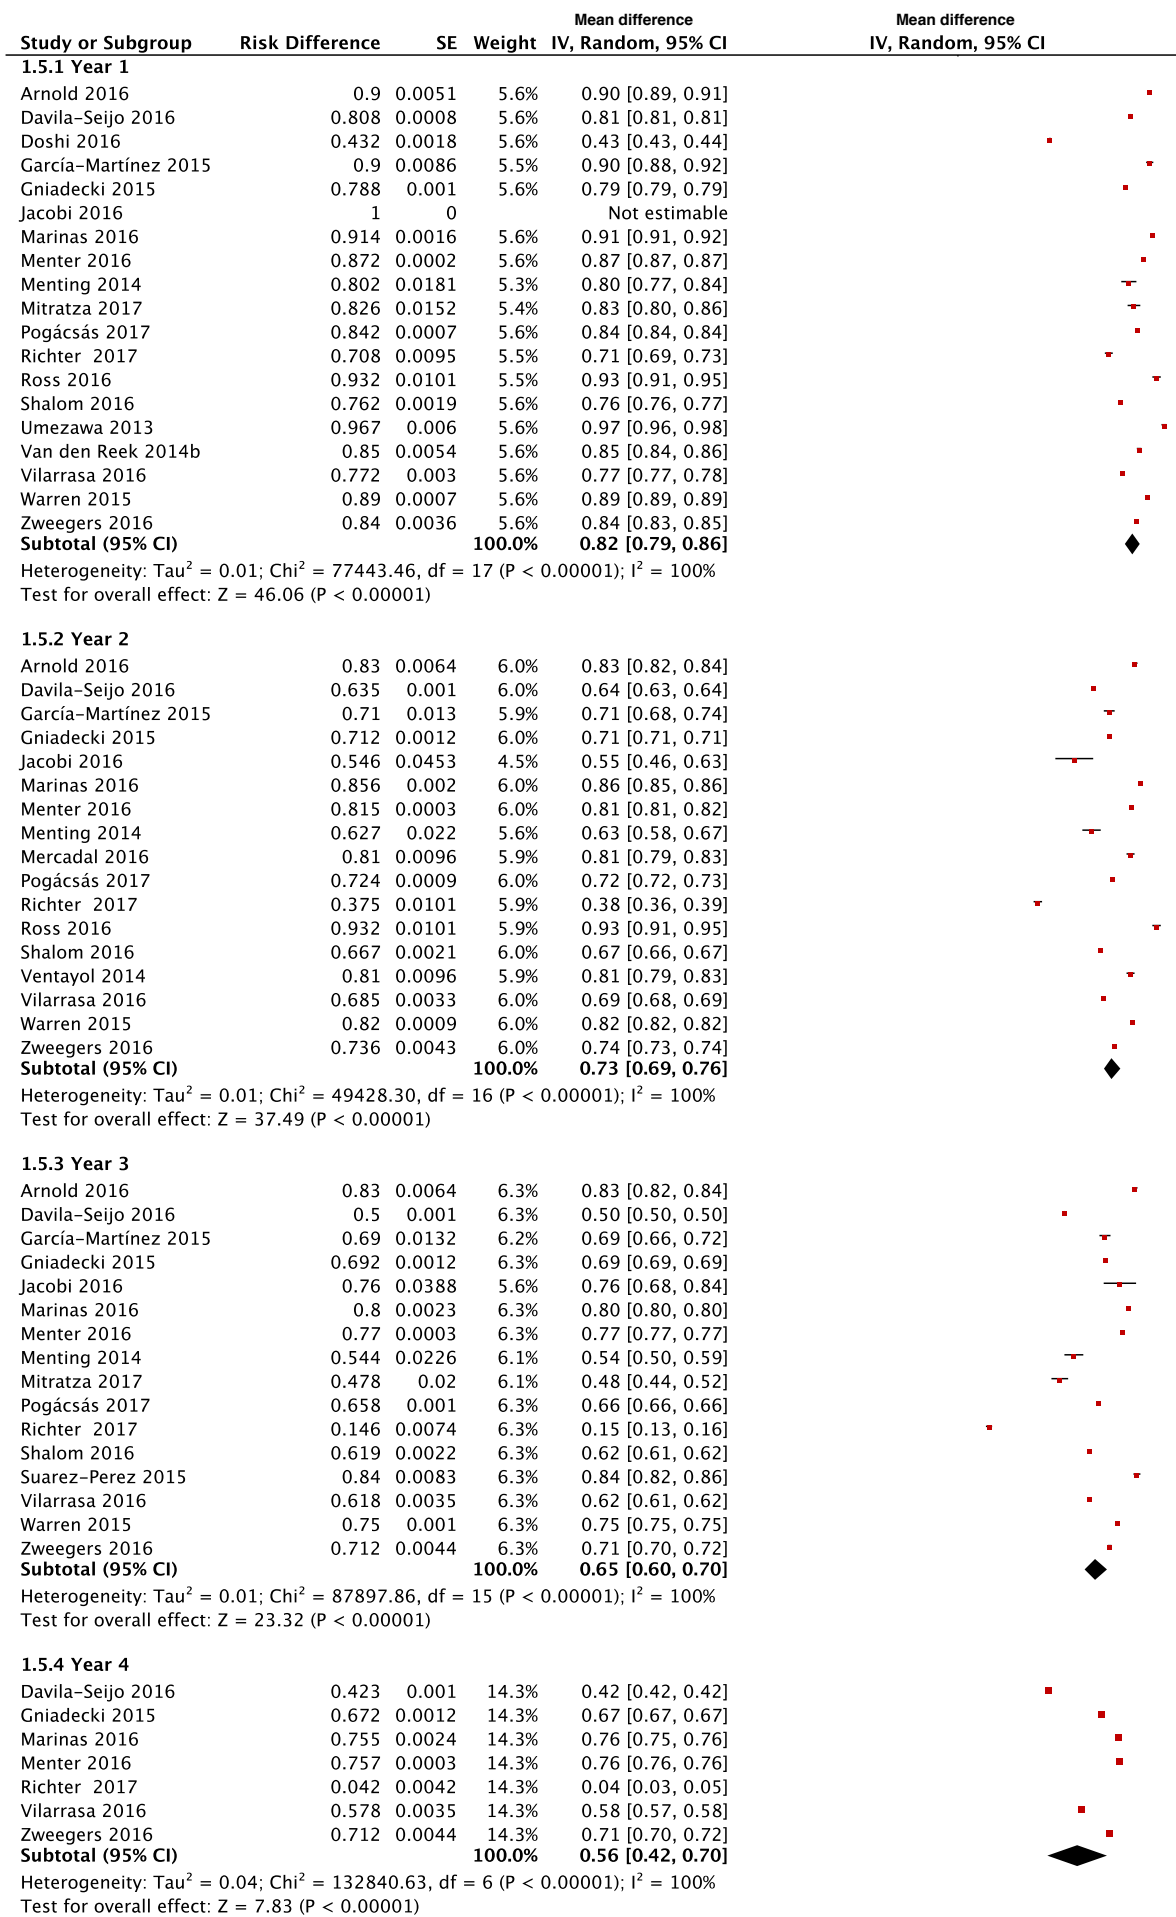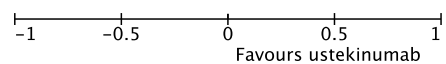

Test for subgroup differences: Chi<sup>2</sup> = 37.57, df = 3 (P < 0.00001), I<sup>2</sup> = 92.0%

Supplementary Figure S2(a): Forest plots of drug survival of biologics for treating psoriasis in biologic-naïve subjects with etanercept.

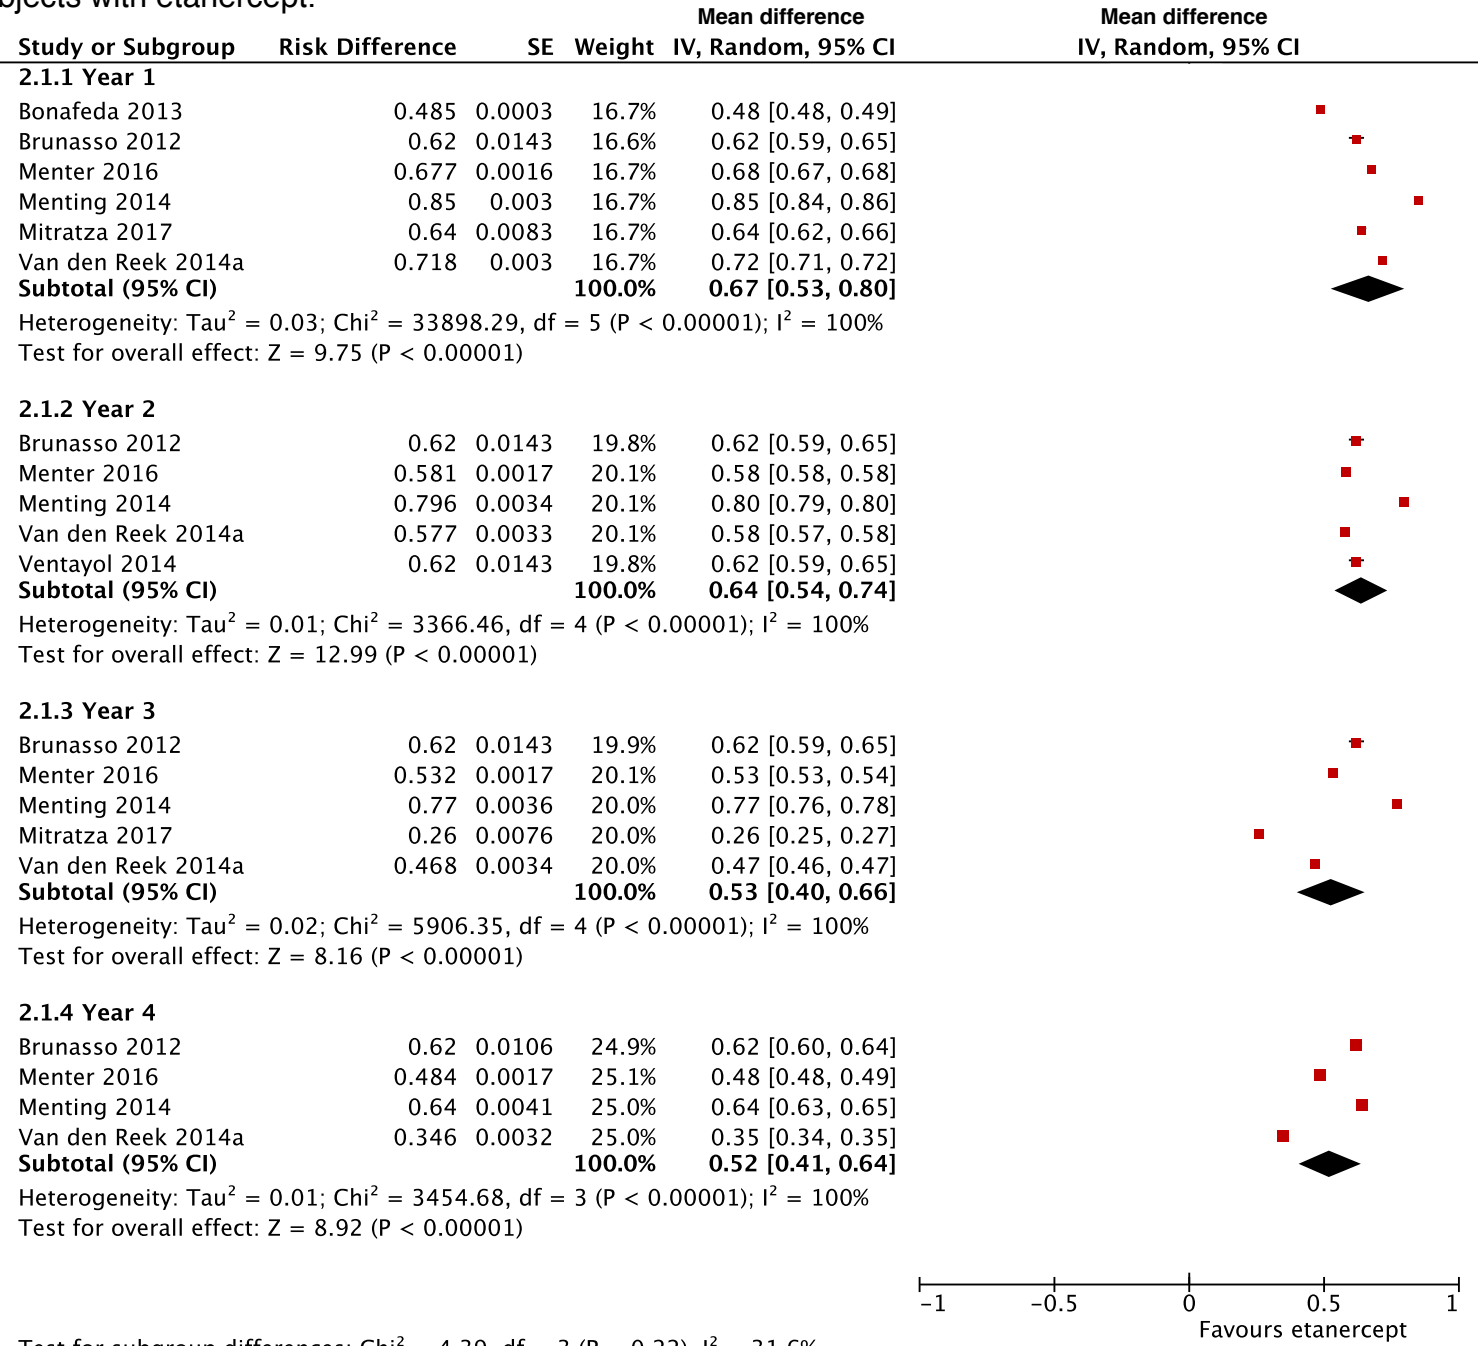

Test for subgroup differences: Chi<sup>2</sup> = 4.39, df = 3 (P = 0.22), I<sup>2</sup> = 31.6%

Supplementary Figure S2(b): Forest plots of drug survival of biologics for treating psoriasis in biologic-naïve subjects with adalimumab.

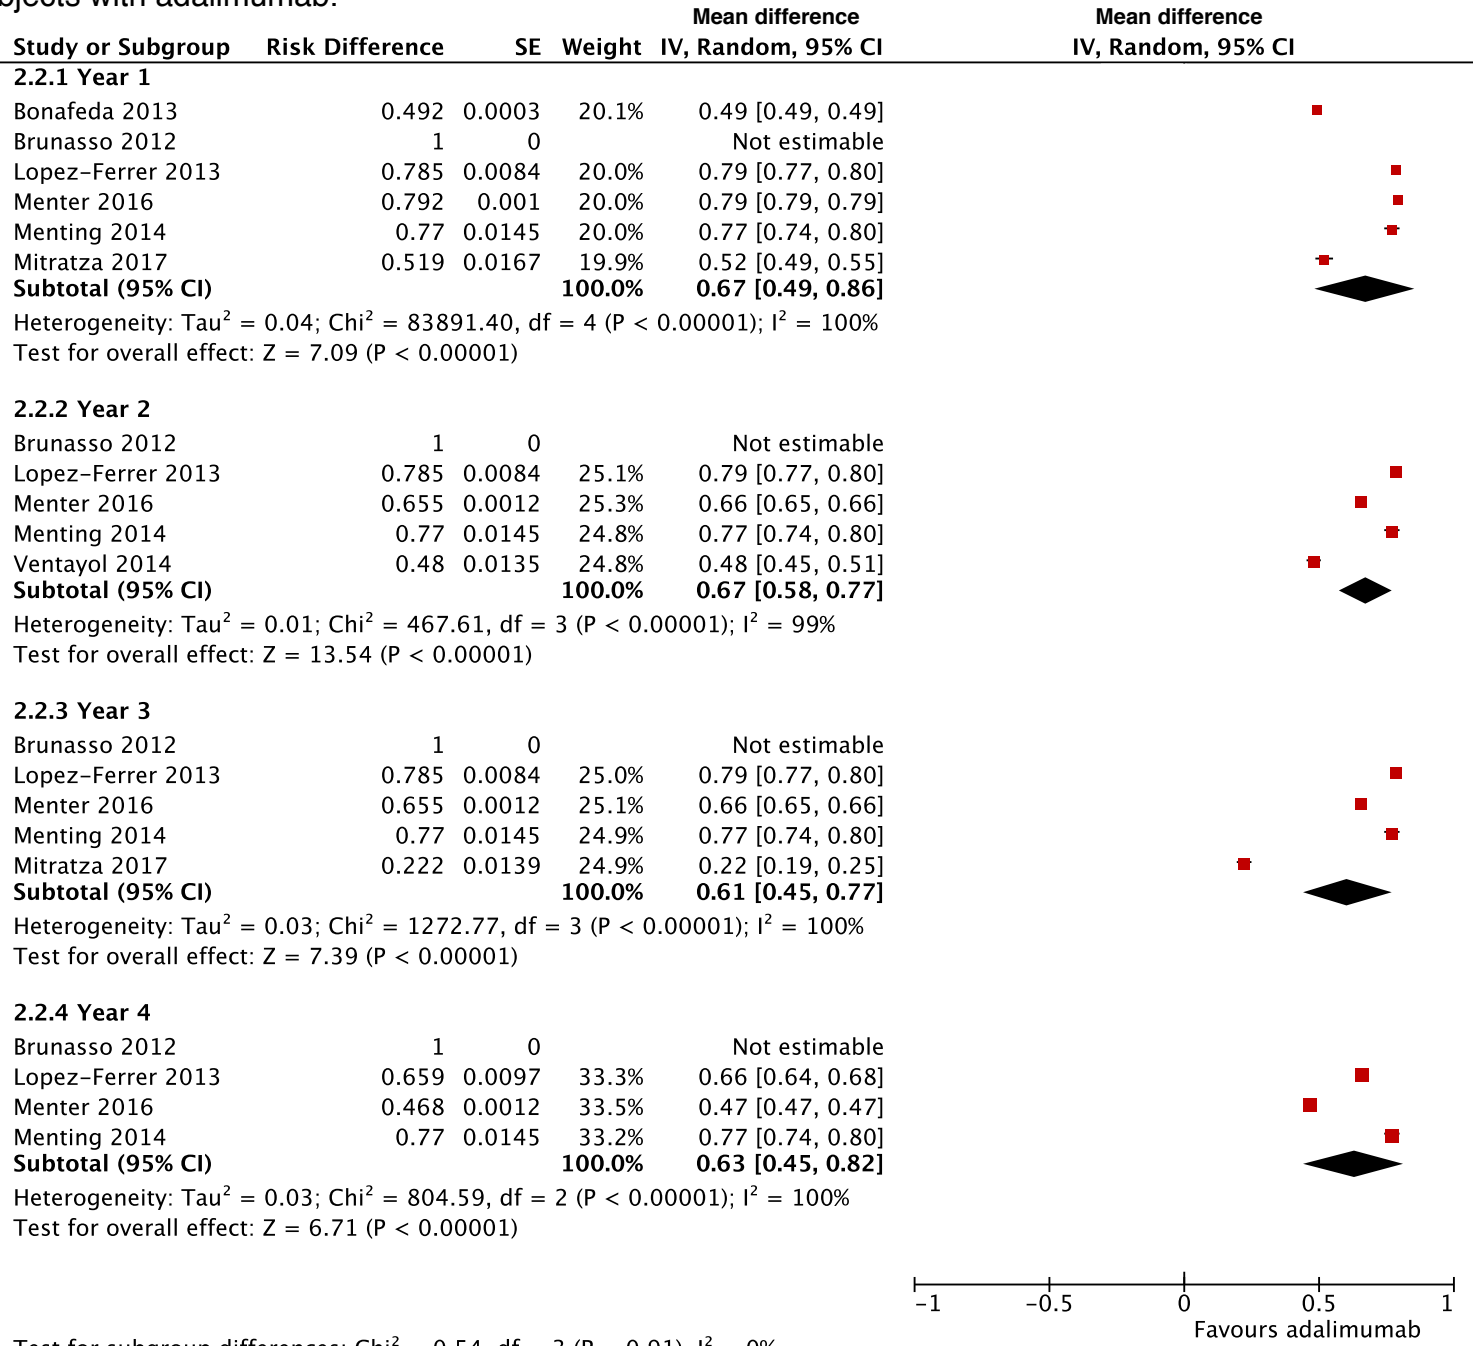

Test for subgroup differences: Chi<sup>2</sup> = 0.54, df = 3 (P = 0.91), I<sup>2</sup> = 0%

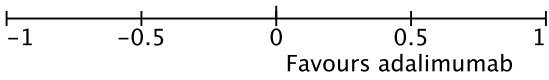



Supplementary Figure S2(c): Forest plots of drug survival of biologics for treating psoriasis in biologic-naïve subjects with infliximab.

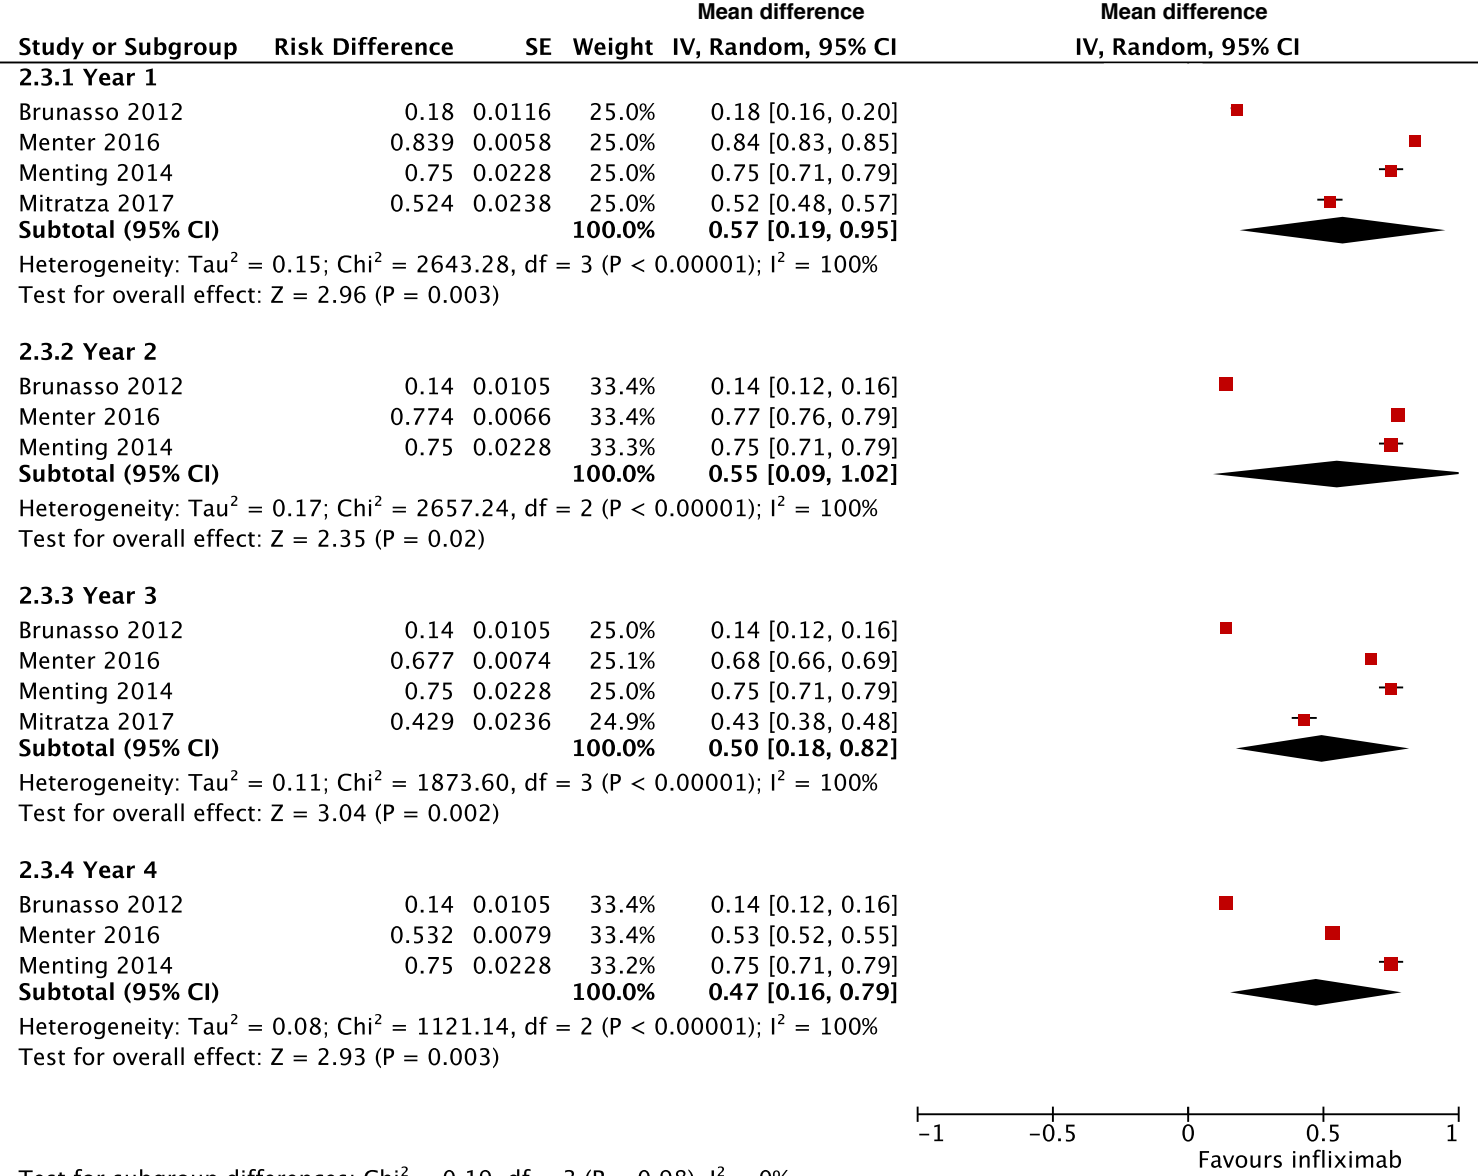

Test for subgroup differences: Chi<sup>2</sup> = 0.19, df = 3 (P = 0.98), I<sup>2</sup> = 0%

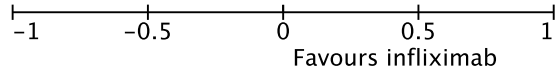

Supplemetnary Figure S2(d): Forest plots of drug survival of biologics for treating psoriasis in biologic-naïve subjects with ustekinumab.

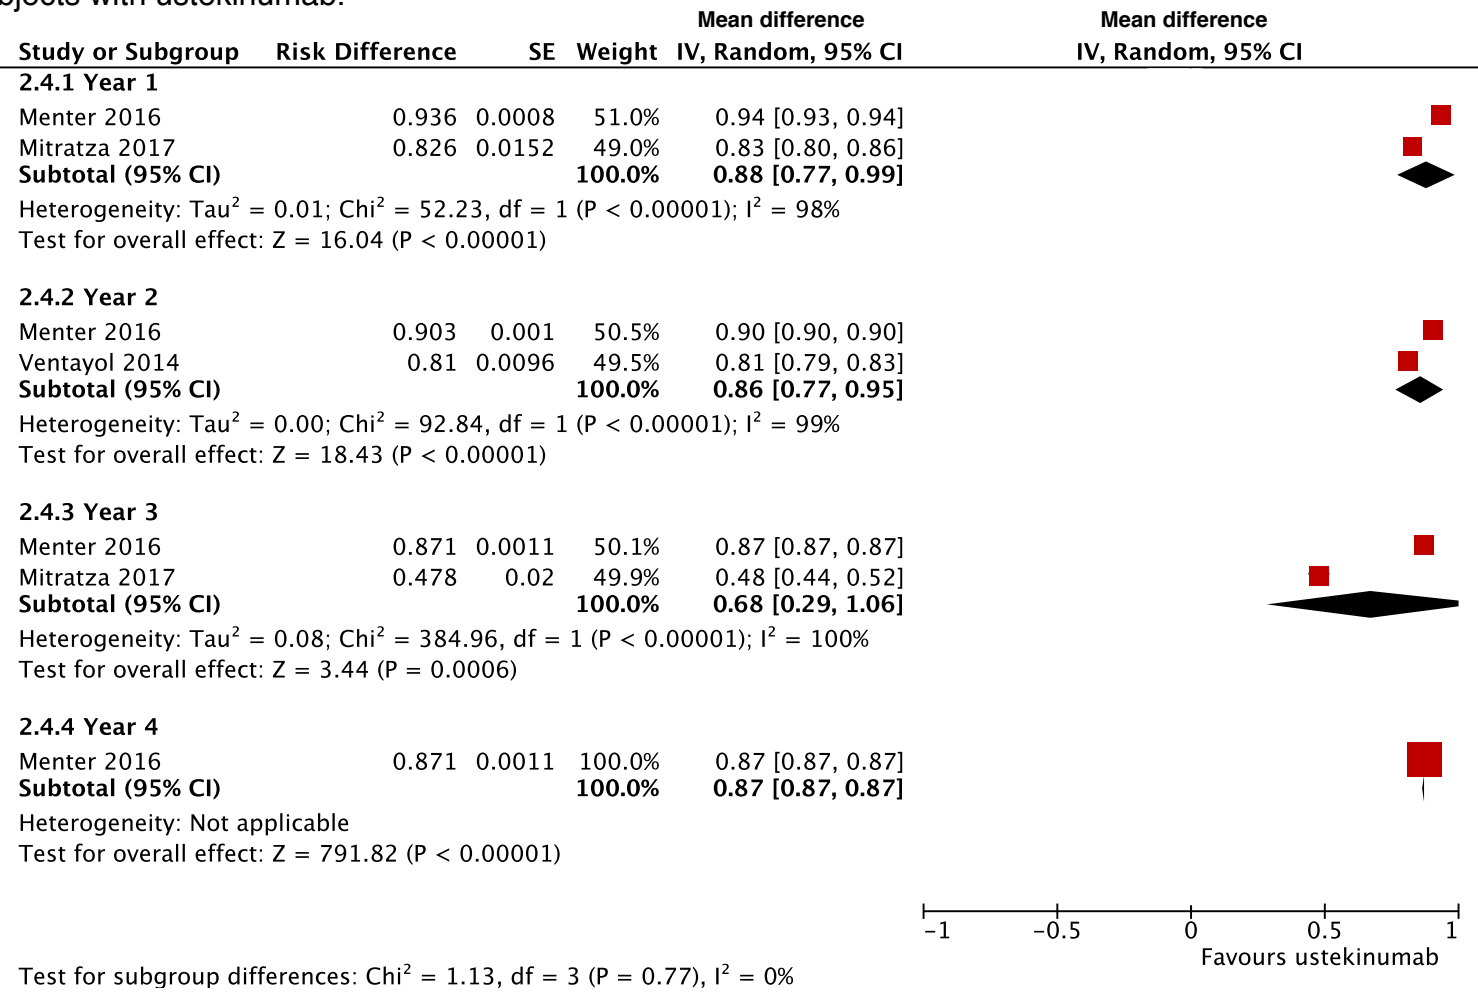

Supplementary Figure S3(a): Forest plots of drug survival for discontinue due to loss of efficacy with etanercept.

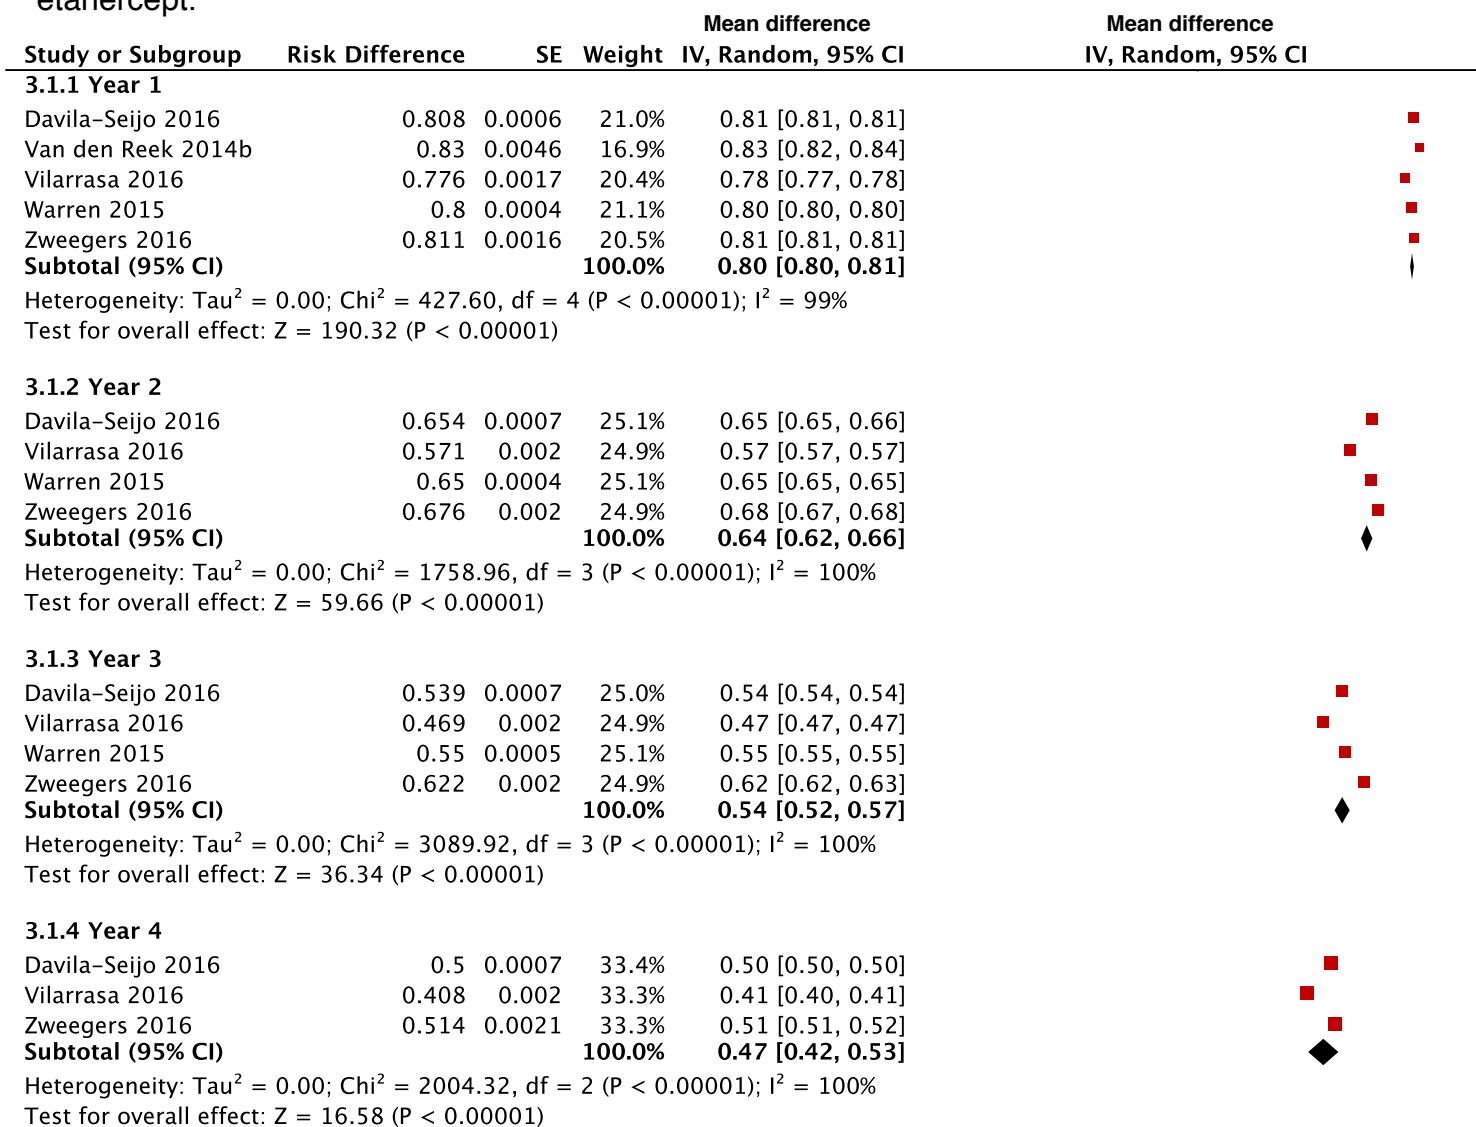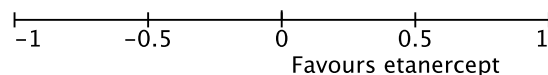

Test for subgroup differences: Chi<sup>2</sup> = 545.09, df = 3 (P < 0.00001), I<sup>2</sup> = 99.4%

Supplemetnary Figure S3(b): Forest plots of drug survival for discontinue due to loss of efficacy with adalimumab.

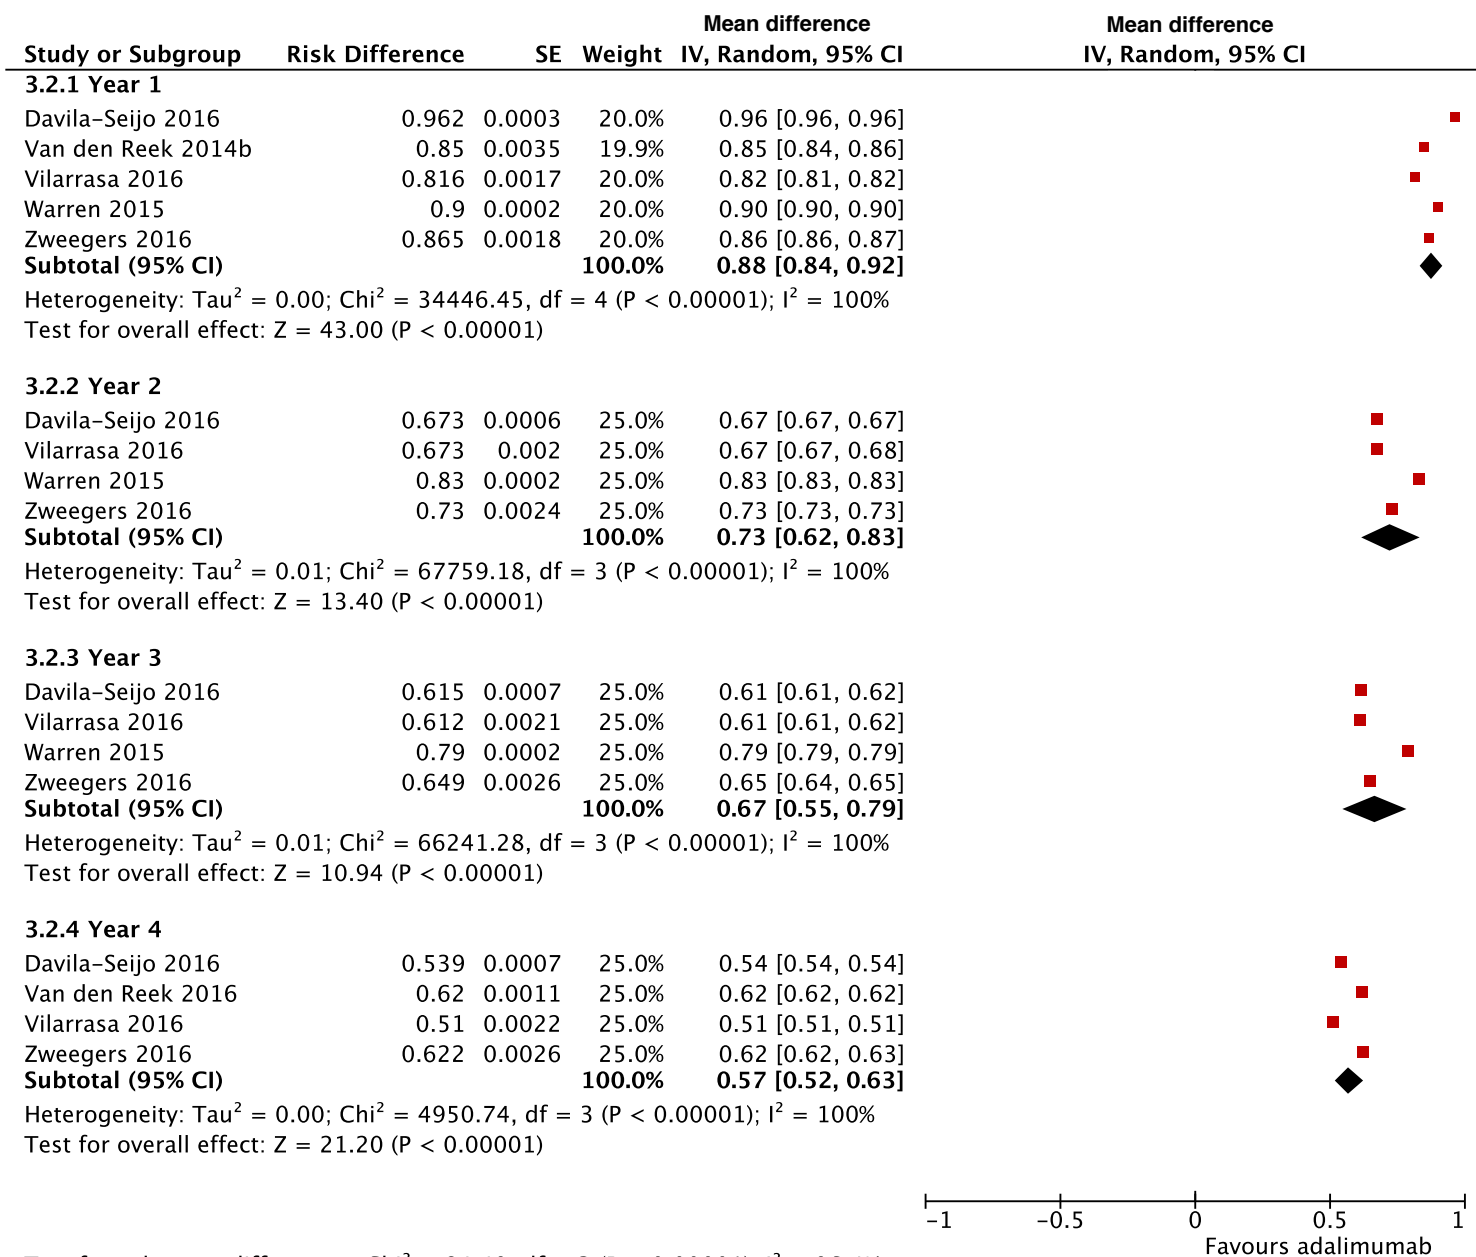

Supplemetnary Figure S3(c): Forest plots of drug survival for discontinue due to loss of efficacy with infliximab.

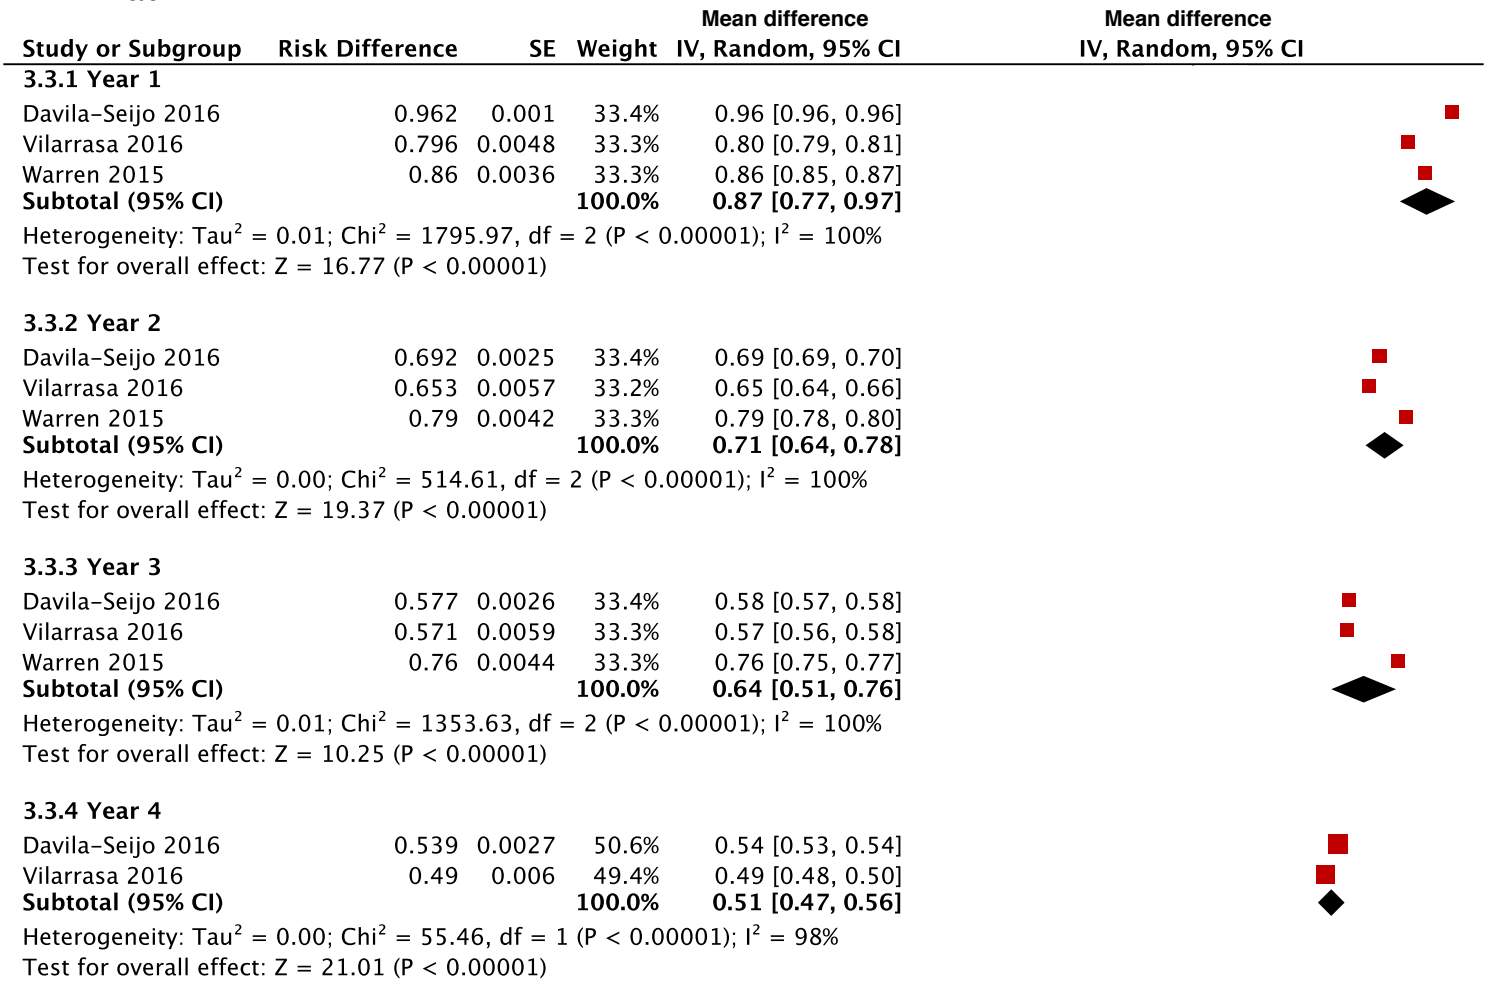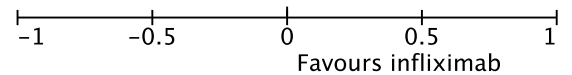

Test for subgroup differences: Chi<sup>2</sup> = 48.30, df = 3 (P < 0.00001), I<sup>2</sup> = 93.8%

Supplementry Figure S3(d): Forest plots of drug survival for discontinue due to loss of efficacy with ustekinumab.

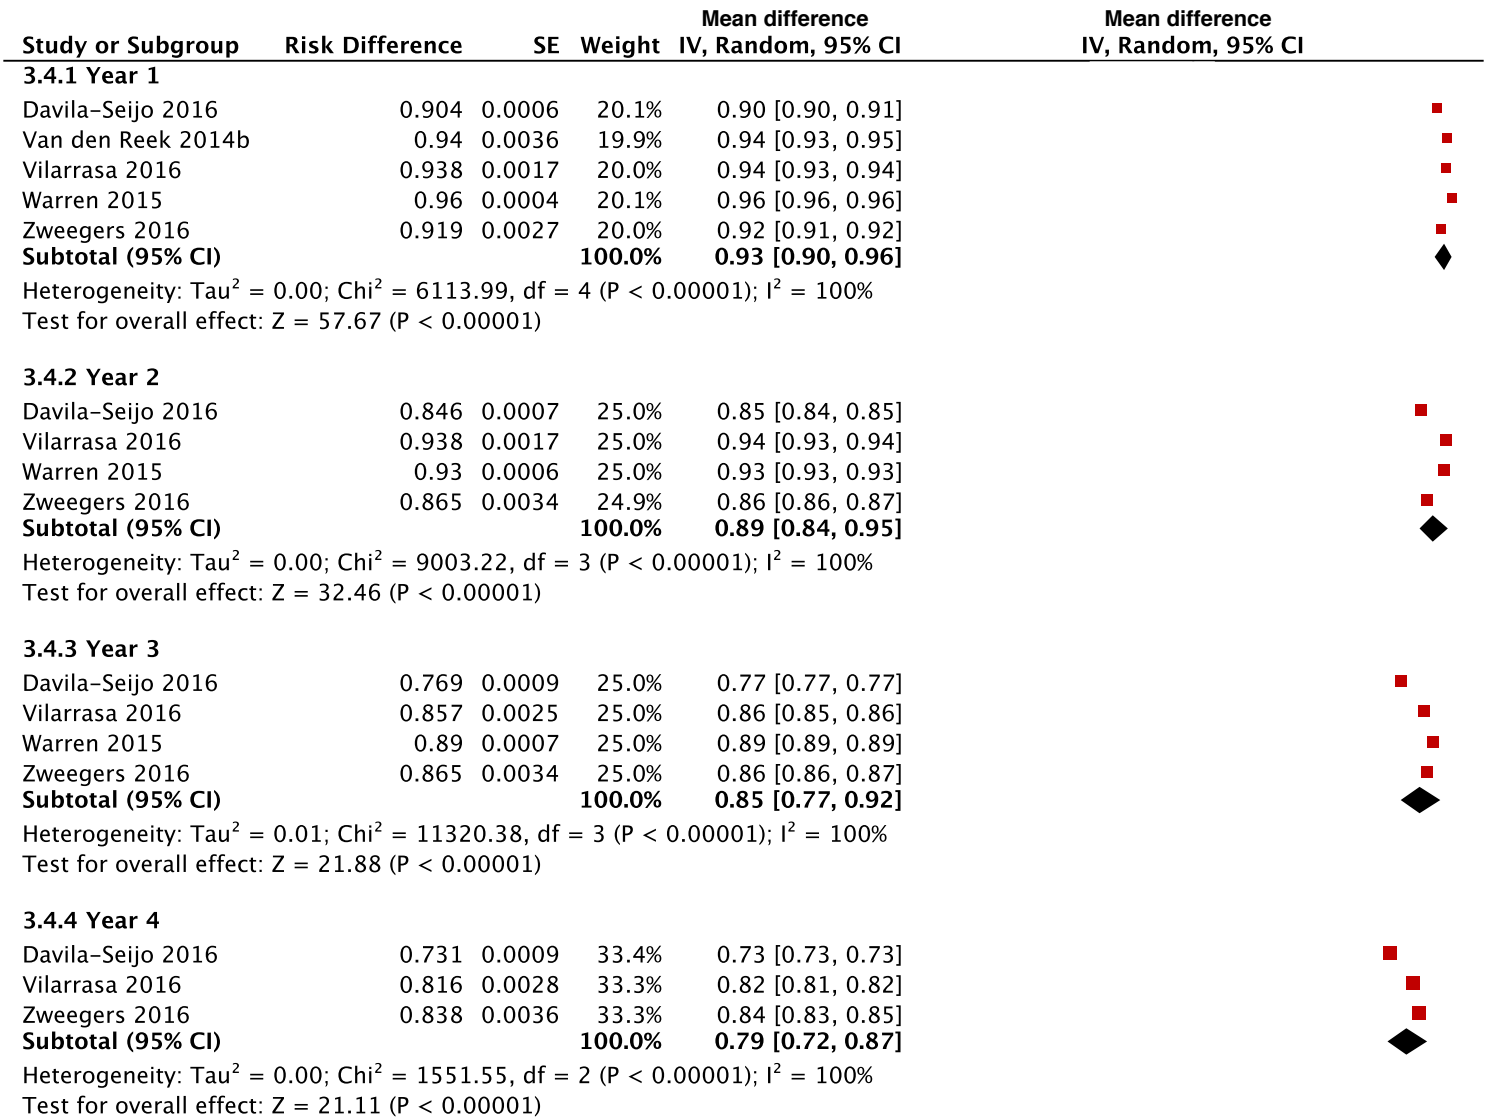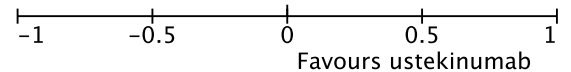

Test for subgroup differences: Chi<sup>2</sup> = 13.79, df = 3 (P = 0.003), I<sup>2</sup> = 78.2%

Supplementary Figure S4(a): Forest plots of drug survival for discontinue due to adverse effects with etanercept.

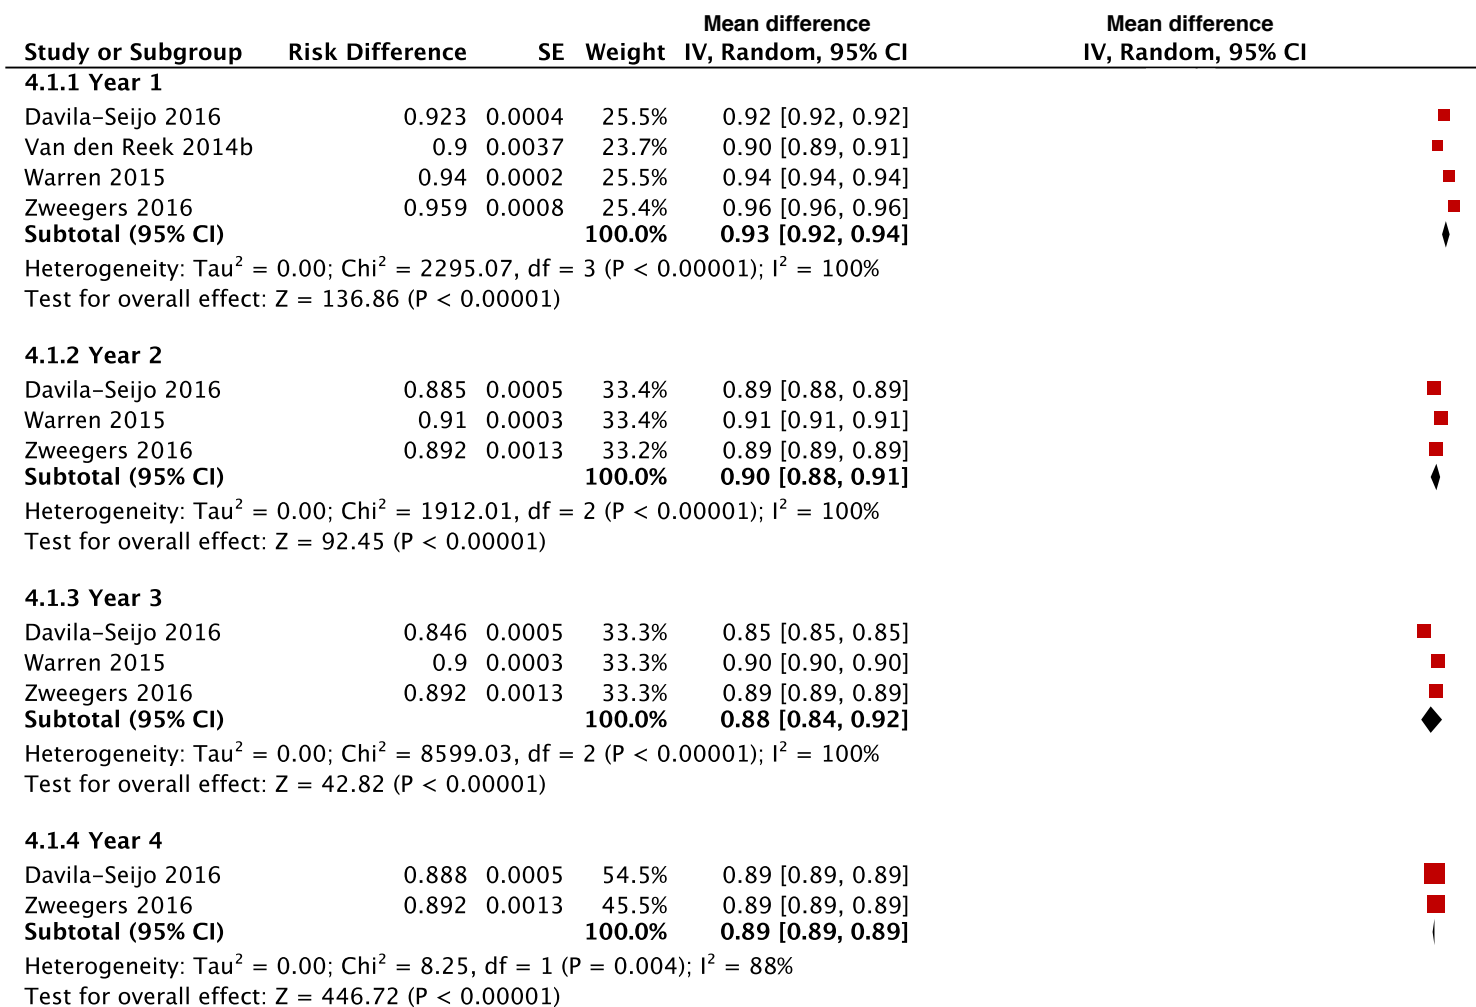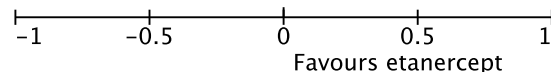

Test for subgroup differences: Chi<sup>2</sup> = 34.30, df = 3 (P < 0.00001), I<sup>2</sup> = 91.3%

Supplementary Figure S4(b): Forest plots of drug survival for discontinue due to adverse effects with adalimumab.

| Study or Subgroup                                                                                               | Risk Difference | SE     | Weight        | Mean difference<br>IV, Random, 95% CI | Mean difference<br>IV, Random, 95% CI |
|-----------------------------------------------------------------------------------------------------------------|-----------------|--------|---------------|---------------------------------------|---------------------------------------|
| <b>4.2.1 Year 1</b>                                                                                             |                 |        |               |                                       |                                       |
| Davila-Seijo 2016                                                                                               | 0.923           | 0.0004 | 25.7%         | 0.92 [0.92, 0.92]                     | ■                                     |
| Van den Reek 2014b                                                                                              | 0.95            | 0.0022 | 24.0%         | 0.95 [0.95, 0.95]                     | ■                                     |
| Warren 2015                                                                                                     | 0.93            | 0.0001 | 25.7%         | 0.93 [0.93, 0.93]                     | ■                                     |
| Zweegers 2016                                                                                                   | 0.892           | 0.0017 | 24.7%         | 0.89 [0.89, 0.90]                     | ■                                     |
| <b>Subtotal (95% CI)</b>                                                                                        |                 |        | <b>100.0%</b> | <b>0.92 [0.92, 0.93]</b>              | ◆                                     |
| Heterogeneity: Tau <sup>2</sup> = 0.00; Chi <sup>2</sup> = 862.48, df = 3 (P < 0.00001); I <sup>2</sup> = 100%  |                 |        |               |                                       |                                       |
| Test for overall effect: Z = 222.32 (P < 0.00001)                                                               |                 |        |               |                                       |                                       |
| <b>4.2.2 Year 2</b>                                                                                             |                 |        |               |                                       |                                       |
| Davila-Seijo 2016                                                                                               | 0.885           | 0.0004 | 33.5%         | 0.89 [0.88, 0.89]                     | ■                                     |
| Warren 2015                                                                                                     | 0.9             | 0.0002 | 33.6%         | 0.90 [0.90, 0.90]                     | ■                                     |
| Zweegers 2016                                                                                                   | 0.838           | 0.002  | 32.9%         | 0.84 [0.83, 0.84]                     | ■                                     |
| <b>Subtotal (95% CI)</b>                                                                                        |                 |        | <b>100.0%</b> | <b>0.87 [0.86, 0.89]</b>              | ◆                                     |
| Heterogeneity: Tau <sup>2</sup> = 0.00; Chi <sup>2</sup> = 1988.34, df = 2 (P < 0.00001); I <sup>2</sup> = 100% |                 |        |               |                                       |                                       |
| Test for overall effect: Z = 109.30 (P < 0.00001)                                                               |                 |        |               |                                       |                                       |
| <b>4.2.3 Year 3</b>                                                                                             |                 |        |               |                                       |                                       |
| Davila-Seijo 2016                                                                                               | 0.885           | 0.0004 | 33.6%         | 0.89 [0.88, 0.89]                     | ■                                     |
| Warren 2015                                                                                                     | 0.87            | 0.0002 | 33.6%         | 0.87 [0.87, 0.87]                     | ■                                     |
| Zweegers 2016                                                                                                   | 0.824           | 0.002  | 32.8%         | 0.82 [0.82, 0.83]                     | ■                                     |
| <b>Subtotal (95% CI)</b>                                                                                        |                 |        | <b>100.0%</b> | <b>0.86 [0.85, 0.87]</b>              | ◆                                     |
| Heterogeneity: Tau <sup>2</sup> = 0.00; Chi <sup>2</sup> = 1720.49, df = 2 (P < 0.00001); I <sup>2</sup> = 100% |                 |        |               |                                       |                                       |
| Test for overall effect: Z = 115.48 (P < 0.00001)                                                               |                 |        |               |                                       |                                       |
| <b>4.2.4 Year 4</b>                                                                                             |                 |        |               |                                       |                                       |
| Davila-Seijo 2016                                                                                               | 0.846           | 0.0005 | 33.8%         | 0.85 [0.85, 0.85]                     | ■                                     |
| Van den Reek 2016                                                                                               | 0.84            | 0.0008 | 33.7%         | 0.84 [0.84, 0.84]                     | ■                                     |
| Zweegers 2016                                                                                                   | 0.811           | 0.0021 | 32.5%         | 0.81 [0.81, 0.82]                     | ■                                     |
| <b>Subtotal (95% CI)</b>                                                                                        |                 |        | <b>100.0%</b> | <b>0.83 [0.82, 0.84]</b>              | ◆                                     |
| Heterogeneity: Tau <sup>2</sup> = 0.00; Chi <sup>2</sup> = 282.26, df = 2 (P < 0.00001); I <sup>2</sup> = 99%   |                 |        |               |                                       |                                       |
| Test for overall effect: Z = 137.66 (P < 0.00001)                                                               |                 |        |               |                                       |                                       |

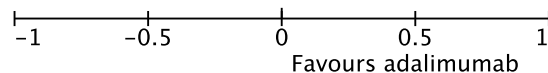

Test for subgroup differences: Chi<sup>2</sup> = 174.28, df = 3 (P < 0.00001), I<sup>2</sup> = 98.3%



Supplementary Figure S4(c): Forest plots of drug survival for discontinue due to adverse effects with infliximab.

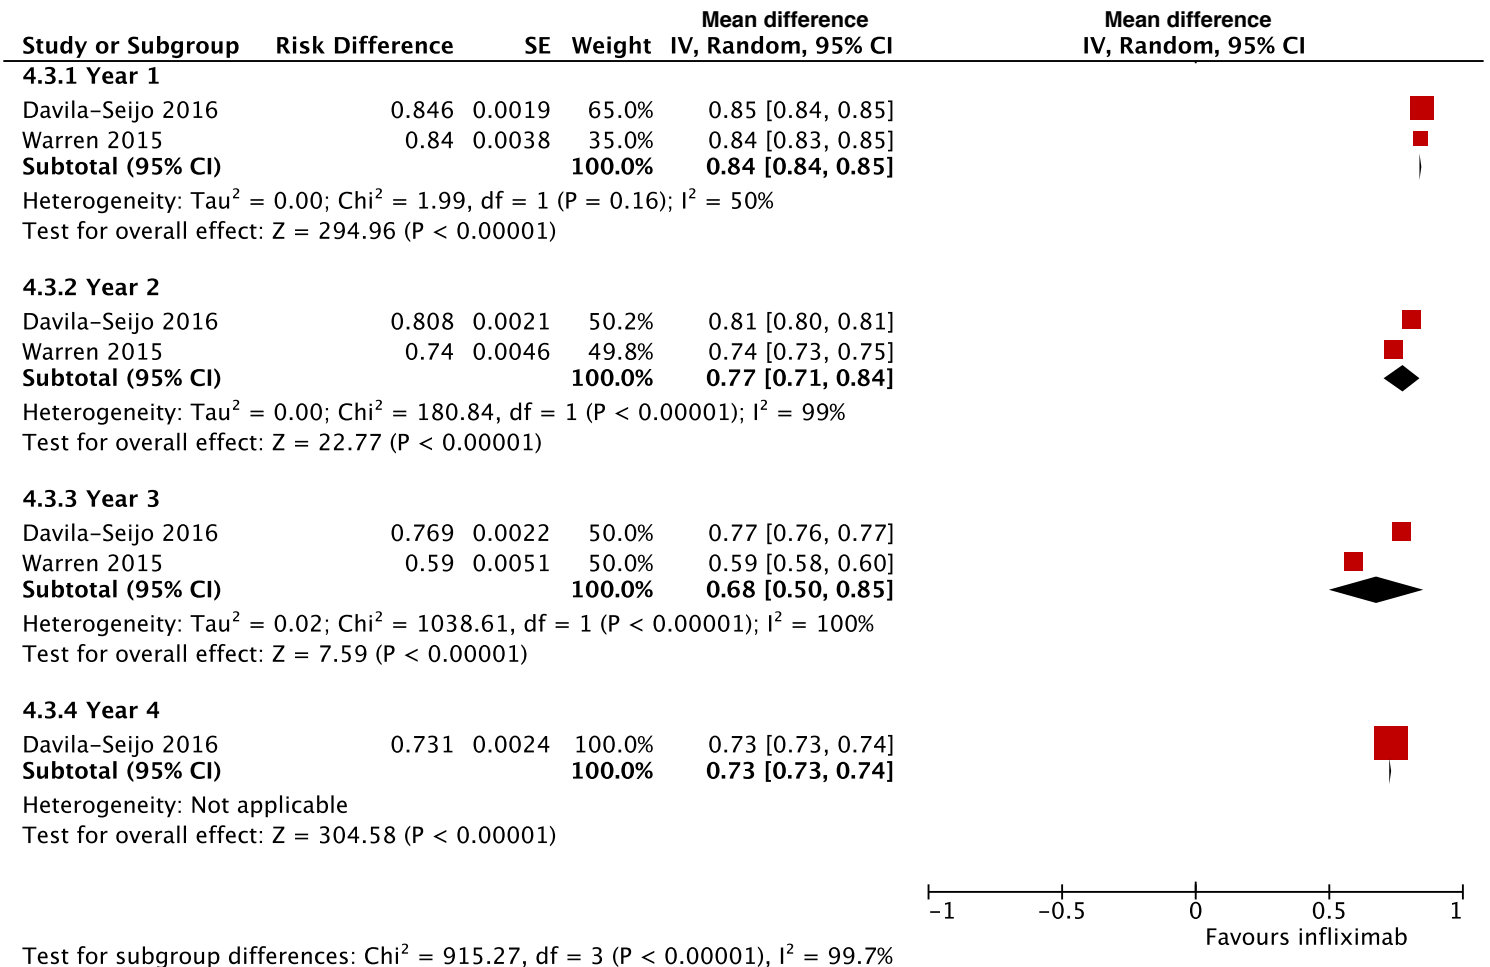

Supplementry Figure S4(d): Forest plots of drug survival for discontinue due to adverse effects with ustekinumab.

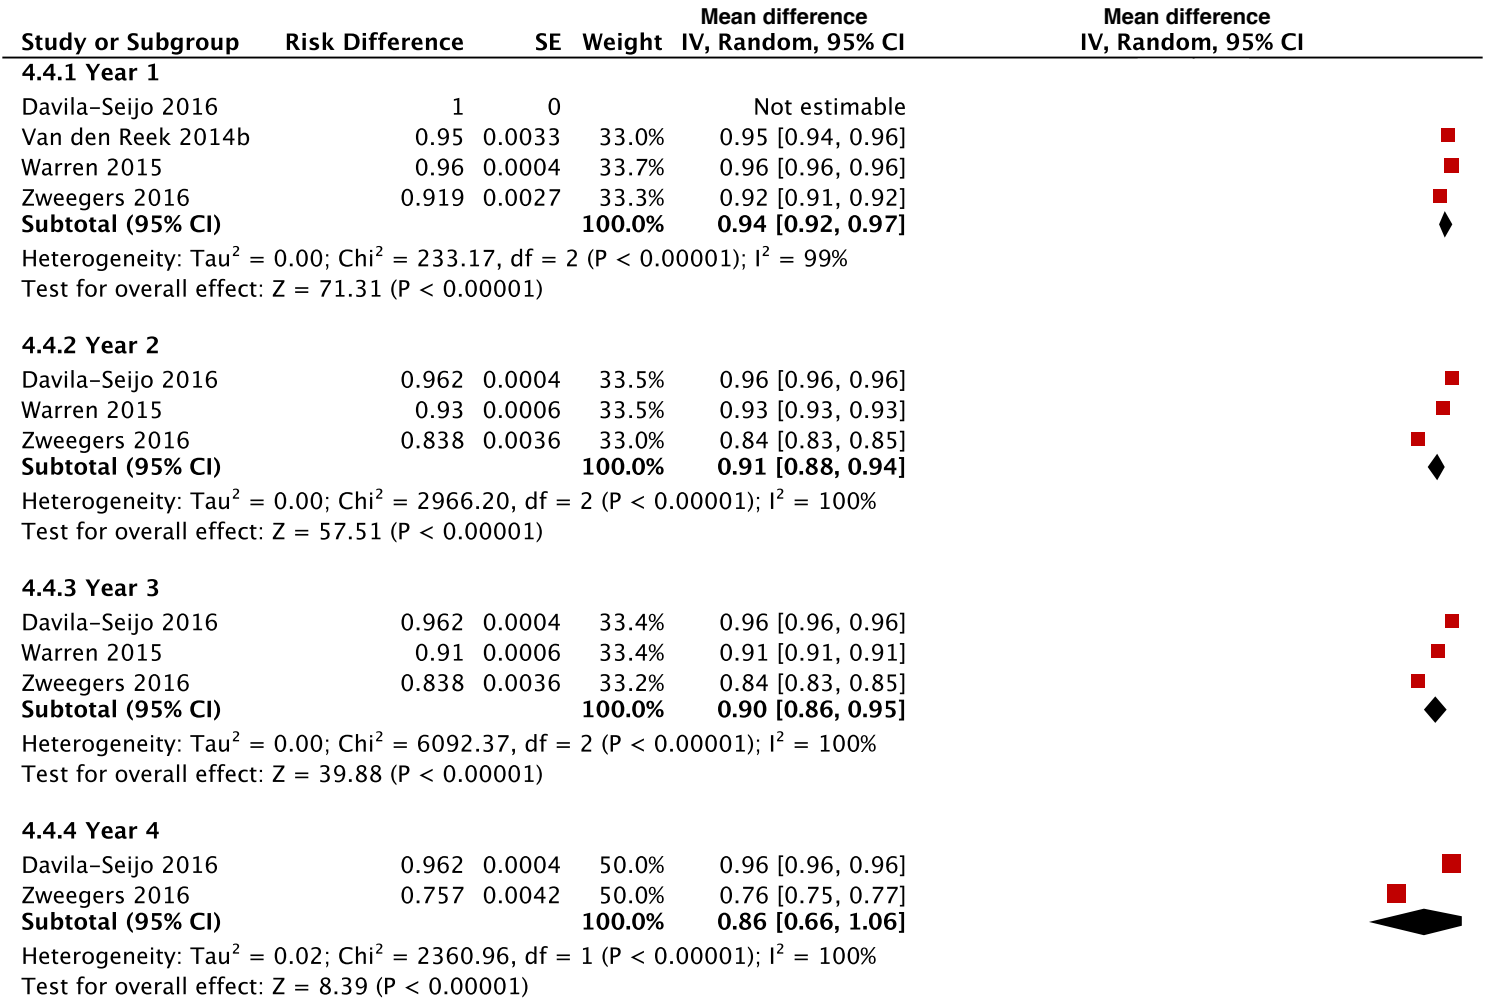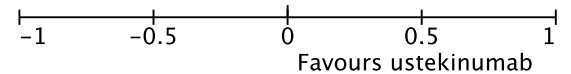

Test for subgroup differences: Chi<sup>2</sup> = 4.02, df = 3 (P = 0.26), I<sup>2</sup> = 25.4%
